# 1 African Swine Fever Virus CD2v protein promotes $\beta$ -Interferon 2 expression and apoptosis in swine cells

3  
4 Sabal Chaulagain<sup>a</sup>, Gustavo Delhon<sup>b</sup>, Sushil Khatiwada<sup>a</sup>, Daniel L. Rock<sup>a\*</sup>

5  
6 a. Department of Pathobiology, College of Veterinary Medicine, University of Illinois at Urbana-  
7 Champaign, Urbana, IL, United States of America.

8 b. School of Veterinary Medicine and Biomedical Sciences, Nebraska Center for Virology,  
9 University of Nebraska-Lincoln, NE, United States of America

10  
11 \*Address correspondence to Daniel L. Rock, [dlock@illinois.edu](mailto:dlock@illinois.edu)

12  
13 **ABSTRACT** African swine fever (ASF) is a disease of swine characterized by massive  
14 lymphocyte depletion in lymphatic tissues due to apoptosis of B and T cells, most likely triggered  
15 by proteins or factors secreted by infected adjacent macrophages. Here we describe a role for the  
16 ASF virus (ASFV) protein CD2v in apoptosis induction in lymphocytes. CD2v is a viral homolog  
17 of host CD2 that has been implicated in viral virulence and immunomodulation *in vitro*; however,  
18 its actual function remains unknown. We show that CD2v is secreted into culture medium of  
19 CD2v-expressing swine cells; and expression of- or treatment with CD2v led to significant  
20 induction of IFN- $\beta$ /ISGs transcription and antiviral state. CD2v expression led to enhanced NF-  
21  $\kappa$ B-p65 nuclear translocation in these cultures and incubation with a NF- $\kappa$ B inhibitor reduced  
22 CD2v-induced NF- $\kappa$ B-p65 nuclear translocation and IFN- $\beta$  transcription. We show that CD2v  
23 binds CD58, the natural CD2 ligand, and that CD58 siRNA knock-down results in significant  
24 reduction in NF- $\kappa$ B-p65 nuclear translocation and IFN- $\beta$  transcription. Treatment of swine PBMC  
25 with purified CD2v led to enhanced NF- $\kappa$ B-p65 nuclear translocation and induction of IFN- $\beta$   
26 transcription. Further, induction of caspase-3 and PARP1 cleavage was observed in these swine  
27 PBMC at later times, providing a mechanism for CD2v-induced apoptosis of lymphocytes. Finally,  
28 IFN- $\beta$  induction and NF- $\kappa$ B activation was inhibited in swine PBMC treated with purified CD2v  
29 pre-incubated with antibodies against CD2v. Overall, our results indicate that ASFV CD2v is an  
30 immunomodulatory protein that, by promoting lymphocyte apoptosis, may contribute to bystander  
31 lymphocyte depletion observed during ASFV infection in pigs.

32  
33 **IMPORTANCE** ASF, a severe hemorrhagic disease of domestic swine, represents a significant  
34 economic threat to swine industry worldwide. One critical pathological event observed in pigs  
35 infected with virulent isolates is an extensive destruction of lymphoid tissue and massive  
36 lymphocyte depletion. However, viral factor/s involved in this event are yet to be identified. Here  
37 we show that, by inducing NF- $\kappa$ B-dependent IFN signaling, ASFV CD2v is able to promote  
38 apoptosis in swine PBMC. We propose that CD2v released by ASFV-infected macrophages  
39 contributes to the massive depletion of lymphocytes observed in lymphoid tissues of infected pigs.  
40 Results here improve our understanding of ASFV pathogenesis and will encourage novel  
41 intervention approaches.

42 **KEYWORDS** African swine fever virus, CD2v, Interferon- $\beta$ , NF- $\kappa$ B, CD58, Lymphocyte,  
43 Apoptosis, Pathogenesis

## 44 45 **INTRODUCTION**

46 African swine fever (ASF) is a severe hemorrhagic disease of swine caused by ASF virus (ASFV),  
47 a complex enveloped DNA virus which is currently the sole member of *Asfarviridae* family and  
48 the only known DNA arbovirus. The disease is endemic to sub-Saharan African countries where  
49 virus cycles between bushpigs and warthogs, and *Ornithodoros sp.* ticks (1-4). While infection of  
50 wild pigs is asymptomatic, infection of domestic pigs can result in mortality approaching 100%.  
51 Clinical forms of ASF disease range from per-acute to chronic depending on the virus strain and  
52 host factors (5-7). Lesions are most notably seen in lymphoid organs, and are characterized by  
53 massive lymphocyte depletion and lymphatic tissue destruction (6-10). Although ASF virus  
54 replicates in macrophages (11-14), infection with virulent ASFV causes marked apoptosis in B  
55 and T cells, which are not targets for viral replication (3, 15-19). It has been suggested that  
56 lymphocyte apoptosis is most likely induced by proteins or factors secreted or released by infected  
57 macrophages (19-22). Currently, no ASFV protein function has been associated with apoptosis  
58 induction in lymphocytes.

59 Interferons (IFNs) provide the first line of defense against virus infection. There are three  
60 different types of IFNs, types I, II and III. Type I IFNs consist of 13 IFN- $\alpha$  subtypes and IFN- $\beta$ .  
61 Type II and III IFN consists of IFN- $\gamma$  and 3 subtypes of IFN- $\lambda$ , respectively. Nearly all cell types  
62 produce type I IFNs when host pathogen recognition receptors (PRRs) bind different pathogen  
63 associated molecular patterns (PAMPs) (23). IFNs exert their effects by signaling through their  
64 specific receptors, leading to transcriptional induction of interferon stimulated genes (ISGs). ISGs  
65 mediate the anti-viral, anti-proliferative and immunomodulatory functions of IFN (24).  
66 Uncontrolled high levels of type I IFN during viral infection might be detrimental to the host as it  
67 has been associated with immunopathology, immunosuppression, enhanced pathology and disease  
68 progression (25). The importance of interferon for control of virus infections is reflected by the  
69 myriad of genes encoded by different types of viruses that target interferon responses (26, 27).

70 IFN- $\beta$  induction is mediated by two major groups of transcription factors, nuclear factor- $\kappa$ B  
71 (NF- $\kappa$ B) and IFN-regulatory factors (IRFs) (28-32). Canonical NF- $\kappa$ B activation involves  
72 inhibitor kappa- $\beta$  kinase (IKK) complex activation that leads to phosphorylation and degradation  
73 of inhibitor kappa- $\beta$  (I $\kappa$ B) proteins resulting in NF- $\kappa$ B nuclear translocation and subsequent  
74 transcriptional induction of pro-inflammatory genes, including IFN- $\beta$  (33-38). Lack of NF- $\kappa$ B  
75 activity leads to decreased expression of IFN- $\beta$  in cells (39, 40). Because of the central role of NF-  
76  $\kappa$ B in various antiviral responses, viruses target multiple steps on NF- $\kappa$ B activation, from PRR  
77 recognition to NF- $\kappa$ B mediated gene transcription (41).

78 ASFV genome encodes several genes that function to interfere with NF- $\kappa$ B and IFN pathways  
79 in macrophages. For example, genes of the multi-gene family 360 and 530 (MGF360/MGF530)  
80 suppress IFN induction through yet unidentified mechanisms; DP96 inhibits the cGAS-STING-  
81 TBK pathway initiated by viral DNA, leading to inhibition of NF- $\kappa$ B /IRF-3-mediated IFN- $\beta$   
82 induction; A238L inhibits NF- $\kappa$ B activation by binding to the NF- $\kappa$ B subunit RelA, and by  
83 inhibiting the acetylation of NF- $\kappa$ B-p65 by p300; and I329L inhibits dsRNA-induced NF- $\kappa$ B and  
84 IRF3 activation (42-45). Although virulent ASFV induces very low level of IFNs inconsistently

85 during infection of macrophages *in vitro* (46-51), pigs infected with virulent ASFV show high  
86 levels of IFNs in serum and enhanced levels of cytokines (TNF $\alpha$ , IL-1 $\alpha$ , IL-1 $\beta$  and IL-6) in serum  
87 and organs (19-22, 52, 53). This suggests a role/s of IFNs of ASFV pathogenesis in pigs.

88 Uncharacterized soluble factors released by ASFV-infected macrophages have been shown to  
89 inhibit proliferation of swine lymphocytes in response to lectins (54). CD2v, the ASFV  
90 hemagglutinin and homolog of host T cell and NK cell surface antigen CD2, has been shown to  
91 inhibit the proliferation of lymphocytes in response to lectins, suggesting that CD2v has  
92 immunosuppressive activity *in vitro* (55). CD2v contains all the domains present in cellular CD2  
93 and some of the residues involved in binding to its natural ligand, CD58 (56, 57). CD2-CD58  
94 interaction has been shown to activate cellular kinases in lymphocytes; however, the involvement  
95 of NF- $\kappa$ B signaling downstream CD2-CD58 interaction has not been shown (58-67).

96 The aim of this study is to investigate immunomodulatory function/s of ASFV CD2v and define  
97 a role of CD2v in induction of lymphocyte apoptosis. We show here that expression of- or  
98 treatment with- CD2v leads to induction of IFN- $\beta$ , ISGs and the antiviral state in swine cells. We  
99 also show that CD2v- induced IFN- $\beta$  expression requires NF- $\kappa$ B activation and CD2v-CD58  
100 interaction. Importantly, CD2v treatment induces apoptosis in swine PBMC.

101

## 102 RESULTS

103 **ASFV CD2v localizes in perinuclear region, cytoplasm and cell membrane of PK15 cells**  
104 **and is secreted into the culture supernatant.** CD2v is an ASFV structural transmembrane  
105 glycoprotein homologous to CD2, a cell adhesion molecule expressed by T- and NK-cells (56, 57).  
106 CD2v encodes for a protein of 370 amino acids, with a predicted molecular weight of 42 kDa and  
107 is expressed on the surface of ASFV-infected macrophages. CD2v mediates hemadsorption of  
108 swine red blood cells (RBCs) (56, 57) and, together with viral C-type lectin, has a role in  
109 hemadsorption inhibition (HAI) serotype specificity (71).

110 To examine the subcellular localization and expression kinetics of CD2v, PK15 cells were  
111 mock transfected or transfected with pCMV plasmid expressing C-terminally HA-tagged CD2v  
112 (CD2v-HA) and examined at various times post-transfection (pt) by confocal microscopy. CD2v  
113 was observed adjacent to the nucleus at 2 h pt, and in the cell membrane, perinuclear area and  
114 cytoplasmic vesicles at later times pt (Fig. 1A). To confirm that CD2v expressed by PK15 cells is  
115 capable of hemadsorption, PK15 cells were transfected with pEmpty-HA (control plasmid) or  
116 pCD2v-HA and incubated with swine red blood cells (RBCs) 24 h later. PK15 transfected with  
117 pCD2v-HA but not with control plasmid hemadsorbed swine RBCs as evidenced by rosette  
118 formation (Fig. 1B, arrowheads).

119 The expression kinetics of CD2v was assessed by Western blot after transfection of PK15 cells  
120 with CD2v-HA. Two major protein species of approximately 100 kDa and 25 kDa, and a less-  
121 abundant 15 kDa species were detected at 6 h pt, with increasing protein levels observed at later  
122 time points (Fig. 2A). A similar expression pattern was observed in 293T cells and Vero cells  
123 (Fig. S1 in supplemental material). The observed molecular weight of the full length protein was  
124 approximately 58 kDa higher than predicted. A single 42 kDa band was detected when CD2v was  
125 expressed in presence of tunicamycin, an inhibitor of N-linked glycosylation, confirming that the  
126 protein is heavily modified through N-linked glycosylation (Fig. S2 in supplemental material) (72).  
127 Because the 25 kDa species is absent in presence of tunicamycin, we speculate that the 25 kDa

128 protein product might result from processing of the full length protein in the endoplasmic  
129 reticulum. A study by Goatley and Dixon (2011) has shown that CD2v in virus-infected cells is  
130 cleaved in the endoplasmic reticulum or Golgi compartments. A faint 100 kDa and a predominant  
131 25 kDa CD2v band were detected in the culture supernatant of PK15 cells 24 h post transfection  
132 with pCD2v-HA, indicating that CD2v is secreted into the culture supernatant (Fig. 2B).

133 Overall, our results are in agreement with previous studies on CD2v expression in ASFV-  
134 infected cells (56, 72, 73). In addition, this is the first study showing that CD2v is secreted into the  
135 culture medium, as previously speculated by others (72, 74).

136 **Expression of ASFV CD2v in PK15 cells induces IFN- $\beta$  and ISGs transcription, and the**  
137 **antiviral state.** Preliminary RNA-Seq experiments were conducted to examine the effect of  
138 secreted CD2v on cellular gene transcription. PK15 cells were incubated with CD2v-containing  
139 supernatant (1:2 dilution) or supernatant from cells transfected with pEmpty-HA (control plasmid),  
140 and total RNA was collected at 1 h, 2 h and 3 h post-treatment. RNA-Seq analysis showed  
141 upregulation of several interferon-stimulated genes (ISGs), including *MX1*, *OAS1*, and *IRF9* at 2  
142 h post treatment with further increase at 3 h, suggesting a potential role of CD2v in IFN- $\beta$  signaling  
143 (data not shown). To assess the effect of CD2v in IFN- $\beta$  and ISG transcription, PK15 cells were  
144 transfected with pCD2v-HA or control plasmids pEmpty-HA and pORFV120-Flag, the latter  
145 encoding for Orf virus protein ORFV120 and IFN- $\beta$  transcription was assessed by RT-PCR.  
146 Compared to controls, cells transfected with pCD2v-HA plasmid showed significant upregulation  
147 of IFN- $\beta$  (5.6-fold) as early as 6 h pt and similar upregulation was observed at all other subsequent  
148 time points (Fig. 3A). Consistent with upregulation of IFN- $\beta$ , significant increase of ISGs *MX1*  
149 (17.7-fold) and *OAS1* (12.8-fold) transcription was observed at 30 h pt with pCD2v-HA plasmid  
150 compared to controls (Fig. 3B and C).

151 To investigate the functional significance of IFN- $\beta$  and ISGs induction by CD2v, the antiviral  
152 state of cells was examined using an IFN bioassay. PK15 cells were transfected with pCD2v-HA  
153 or control plasmids (Empty-HA vector or plasmids expressing Orf virus proteins ORFV120 and  
154 ORFV113), and then infected with reporter VSV<sup>GFP</sup> (50 PFU/well) at various times pt. PK15 cells  
155 transfected with pCD2v-HA but not with control plasmids showed inhibition of VSV<sup>GFP</sup>  
156 replication as determined by both fluorescent microscopy and flow cytometry at 12 h, 24 h and 30  
157 h pt (Fig. 4A and B). Inhibition of VSV<sup>GFP</sup> replication was also observed after treatment of PK15  
158 cells with a two-fold dilution of culture supernatants from cells transfected with Poly (I:C) (up to  
159 dilution 1:8) and pCD2v-HA (up to dilution 1:4) but not with control plasmids (Fig. 4C). These  
160 data indicate that expression of- or treatment with- CD2v in PK15 cells leads to induction of IFN-  
161  $\beta$ , ISGs and an antiviral state.

162 **Induction of IFN- $\beta$  by ASFV CD2v depends on NF- $\kappa$ B activation.** NF- $\kappa$ B and IRF3 are two  
163 important transcription factors involved in IFN- $\beta$  induction (28-32) that translocate to the nucleus  
164 upon activation. To assess whether CD2v expression affects NF- $\kappa$ B-p65 and IRF3 nuclear  
165 translocation, PK15 cells were transfected with pCD2v-HA or control plasmids pORFV120-Flag  
166 and pORFV113-Flag, and examined by IFA at various times pt. Enhanced NF- $\kappa$ B-p65 nuclear  
167 translocation was observed in CD2v expressing cells at all times pt compared to controls (Fig. 5A  
168 and B). In contrast, IRF3 nuclear translocation was not observed (data not shown). To confirm  
169 activation of the NF- $\kappa$ B pathway, PK15 cultures were transfected with pCD2v-HA or pORFV113-  
170 Flag (control), and the mean fluorescence intensity (MFI) of phosphorylated NF- $\kappa$ B (pNF- $\kappa$ B

171 S536) was examined at 3 h pt by flow cytometry. Consistent with the nuclear translocation results,  
172 significantly increased MFI values (1.8-fold) were observed in CD2v-expressing cells compared  
173 to the control (Fig. 5C).

174 To assess whether inhibition of NF- $\kappa$ B affects IFN- $\beta$  induction by CD2v, PK15 cells were  
175 pretreated with the NF- $\kappa$ B inhibitor parthenolide (1 $\mu$ M) or vehicle control (DMSO) for one hour,  
176 transfected with pCD2v-HA in presence of the inhibitor (1 $\mu$ M) or vehicle, and assessed for NF-  
177  $\kappa$ B-p65 nuclear translocation at 3 h pt by confocal microscopy. Percentage of NF- $\kappa$ B-p65 nuclear  
178 translocation in CD2v-expressing cells in presence of parthenolide was significantly reduced  
179 (49.3%) compared to DMSO (Fig. 6A and B).

180 To investigate the effect of NF- $\kappa$ B inhibition on CD2v-mediated IFN- $\beta$  induction, PK15 cells  
181 were pretreated for one hour with parthenolide (1 $\mu$ M) or DMSO (vehicle control), transfected with  
182 pCD2v-HA or pEmpty-HA (control) for 6 h in presence of parthenolide (1 $\mu$ M) or DMSO, and  
183 assessed for IFN- $\beta$  transcription by RT-PCR. Significant reduction in IFN- $\beta$  transcription was  
184 observed in cells transiently expressing CD2v in presence of parthenolide (1.5-fold) compared to  
185 cells expressing CD2v in presence of vehicle alone (2.6-fold) (Fig. 6C). Together, results above  
186 indicate that induction of IFN- $\beta$  by ASFV CD2v is mediated by NF- $\kappa$ B activation.

187 **NF- $\kappa$ B activation and IFN- $\beta$  induction by ASFV CD2v is mediated by interaction of CD2v**  
188 **with host CD58.** CD2v contains all the domains present in cellular CD2 and some of the residues  
189 involved in binding to the CD58, the natural CD2 ligand (56, 57). To study the potential interaction  
190 between CD2v and CD58, PK15 cells were co-transfected with pEmpty-HA vector or pCD2v-HA  
191 and porcine pCD58-Flag, and cell lysates were prepared at 8 h pt for reciprocal co-  
192 immunoprecipitation with anti-Flag or anti-HA antibodies as described in materials and methods.  
193 Figure 7A shows that CD2v and porcine CD58 reciprocally co-immunoprecipitate.

194 To confirm CD2v-CD58 interaction, PK15 cells were co-transfected with pCD2v-HA and  
195 pCD58-Flag, and co-localization of proteins was examined using confocal microscopy. Strong  
196 overlap of signals was observed (Fig. 7B). Similarly, strong reciprocal co-immunoprecipitation  
197 and co-localization of CD2v with endogenous human CD58 was observed in 293T cells transfected  
198 with pCD2v-HA, using anti-HA or anti- hu-CD58 antibodies (Fig. 8A and B). Given that: 1) CD2v  
199 interacts with CD58 (Fig. 7 and Fig. 8) and 2) host CD2-CD58 interaction activates downstream  
200 cellular kinases (58-67), we examined the involvement of CD2v-CD58 interaction in CD2v-  
201 mediated NF- $\kappa$ B activation and IFN- $\beta$  activation.

202 To evaluate the effect of CD58 downregulation on CD2v-mediated NF- $\kappa$ B activation, PK15  
203 cells were transfected with siRNAs targeting porcine CD58 or control siRNA as described in  
204 materials and methods. CD58 transcript knock-down of approximately 55% was routinely  
205 obtained when PK15 cells were transfected with CD58 siRNA compared to the negative control  
206 (Fig. 9A). Twenty-four hours after siRNA treatment, cells were transfected with pCD2v-HA for 3  
207 h, and NF- $\kappa$ B-p65 nuclear translocation was assessed by confocal microscopy. Significant  
208 reduction in NF- $\kappa$ B-p65 nuclear translocation (60%) in CD2v expressing cells was observed in  
209 PK15 cells with reduced CD58 transcript compared to the control (Fig. 9B, C and D).

210 To investigate involvement of CD58-CD2v interaction in CD2v-mediated IFN- $\beta$  induction,  
211 siRNA knock down experiments and CD2v-HA/control transfections were performed as described  
212 above. Significant reduction of IFN- $\beta$  transcription was observed 6 h pt with CD2v-HA in PK15  
213 cells with reduced CD58 transcript levels (1.6-fold) compared to the control (2.3-fold) (Fig. 9E).

214 **Purified CD2v induces NF- $\kappa$ B-p65 nuclear translocation and IFN- $\beta$  transcription in swine**  
215 **PBMC cultures.** Uncharacterized soluble factors released by ASFV-infected macrophages have  
216 been shown to inhibit proliferation of swine lymphocytes in response to lectins (54) and CD2v has  
217 been shown to be involved in inhibition of mitogen-induced proliferation of bystander  
218 lymphocytes in virus-infected swine PBMC cultures (55). This and our observations that CD2v-  
219 expressing PK15 cells secrete CD2v into the culture supernatant, and that cells treated with- or  
220 expressing CD2v upregulate IFN- $\beta$  and ISGs led us to hypothesize that 1- secreted CD2v induces  
221 IFN- $\beta$  and ISGs expression in lymphocytes and 2- induction involves NF- $\kappa$ B-p65 nuclear  
222 translocation.

223 To examine NF- $\kappa$ B-p65 nuclear translocation in swine lymphocytes, swine PBMC were treated  
224 with purified CD2v or purified control for 1.5 or 2 h, processed for IFA and deposited onto glass  
225 slides with a cytospin. Confocal microscopy analysis showed enhanced NF- $\kappa$ B-p65 nuclear  
226 translocation in swine PBMC treated with purified CD2v (2.8-fold at 1.5 h; 1.6-fold at 2 h)  
227 compared to control treatment (Fig. 10A and B).

228 To investigate whether IFN- $\beta$  transcription in lymphocytes is affected by CD2v, swine PBMCs  
229 were treated as above and assessed for IFN- $\beta$  transcription by RT-PCR at various times post-  
230 treatment. We found that IFN- $\beta$  transcription was significantly induced in CD2v-treated PBMCs  
231 at 4 h (3.3-fold) and 6 h (3.2-fold) post treatment compared to purified control (Fig. 10C).

232 **Supernatants from CD2v- treated swine PBMCs exhibit antiviral activity.** To examine the  
233 functional significance of CD2v-induced IFN- $\beta$  expression in swine lymphocytes, swine PBMCs  
234 were treated with purified CD2v or purified control for 24 h, and the supernatants collected,  
235 diluted, and used to treat fresh PK15 cells. Twenty-four hours after treatment the cells were  
236 infected with VSV<sup>GFP</sup> and examined for virus replication at 16 h post infection by IFA. Supernatant  
237 collected from PK15 cell culture transfected with Poly I:C was used as positive control. Significant  
238 inhibition of VSV<sup>GFP</sup> replication was observed in PK15 cells treated with supernatant from  
239 PBMCs. We observed 32.1% inhibition with undiluted supernatant, 24.4% inhibition with 1:2  
240 dilution and 28.1% inhibition with 1:4 dilution (Fig. 11A and B).

241 **CD2v induces apoptosis in swine PBMCs.** ASF is characterized by severe destruction of  
242 lymphoid tissue and massive lymphocyte depletion due to apoptosis (3, 7, 8, 16, 19, 20). An  
243 explanation for this critical pathogenic event is lacking. ASFV replicates in cells of the monocyte  
244 lineage, most notably macrophages, but not in lymphocytes, thus apoptosis in bystander  
245 lymphocytes is most likely due to proteins or factors secreted by infected macrophages. Based on  
246 our data, we hypothesize that CD2v released by infected macrophages induces IFN expression in  
247 bystander lymphocytes leading to apoptosis.

248 To investigate the effect of CD2v on PBMC apoptosis, swine PBMC cultures were treated with  
249 purified CD2v, purified control, or staurosporine (positive control) as described in the materials  
250 and methods, and caspase-3 activation and PARP1 cleavage assessed by Western blot at various  
251 times post treatment. As shown in Fig. 12 A-C, treatment of swine PBMCs with purified CD2v  
252 led to significant induction of caspase-3 activation at 18 h post treatment (1.9-fold) and PARP1  
253 cleavage at 18 h (1.9-fold) and 24 h (1.6-fold) post treatment compared to purified control. This  
254 result indicates that CD2v treatment induces apoptosis in swine PBMC.

255 **Treatment with monoclonal antibodies against ASFV CD2v inhibits CD2v- induced NF-**  
256  **$\kappa$ B activation and IFN- $\beta$  transcription in swine PBMCs.** Monoclonal antibodies against ASFV

257 CD2v were generated and screened as described in materials and methods. Four anti-CD2v  
258 antibodies (A4, C4, C3 and F2) were used as a mixture to examine their reactivity against CD2v.  
259 The antibodies mix detected the full length 100 kDa CD2v species in Western blot (Fig. 13A). To  
260 confirm reactivity of antibodies, lysates from 293T cells transfected with pCD2v-HA were  
261 incubated overnight with the anti-CD2v monoclonal antibodies. Immunoprecipitation products  
262 were assessed by Western blot using anti-HA antibodies. Strong pull down of CD2v by anti-CD2v  
263 monoclonal antibodies was observed in CD2v- but not in control-transfected cells (Fig. 13B). The  
264 results show that the anti-CD2v monoclonal antibodies react with CD2v.

265 To investigate the effect of the anti-CD2v antibodies on CD2v-induced NF- $\kappa$ B activation in  
266 swine PBMC, purified CD2v or purified control were incubated overnight with the monoclonal  
267 antibody mix, anti-ORFV086 monoclonal antibody, or anti-IgG mouse isotype antibody control.  
268 Swine PBMCs were then treated with purified CD2v or purified control pre-incubated with the  
269 various antibodies, processed with NF- $\kappa$ B nuclear translocation assay as above, and analyzed by  
270 confocal microscopy. As a control for the experiment, purified CD2v or purified control without  
271 pre-incubation with antibodies was used to treat swine PBMCs. Significant inhibition of NF- $\kappa$ B-  
272 p65 nuclear translocation (approximately 50% reduction) was observed in PBMCs treated with  
273 CD2v previously incubated with anti-CD2v monoclonal antibodies compared to controls (Fig. 14A  
274 and B). This result supports a role of secreted CD2v in induction of NF- $\kappa$ B-p65 nuclear  
275 translocation in swine PBMCs.

276 The effect of the anti-CD2v monoclonal antibodies on CD2v-induced IFN- $\beta$  expression in  
277 swine PBMC, was investigated by pre-incubating purified CD2v or purified control with the  
278 monoclonal antibodies as above, followed by treatment of PBMC. As a control for the experiment,  
279 purified CD2v or purified control without pre-incubation with antibodies was used to treat swine  
280 PBMC. Total RNA was extracted 6 h post treatment and IFN- $\beta$  transcription was assessed by RT-  
281 PCR. Significant inhibition in IFN- $\beta$  transcription was observed when swine PBMCs were treated  
282 with purified CD2v pre-incubated with anti-CD2v antibody mix (1-fold) as compared to purified  
283 CD2v pre-incubated with anti-ORFV086 monoclonal antibody (1.5-fold) or without pre-  
284 incubation (1.8-fold). These results confirm a role of CD2v in the induction of IFN- $\beta$  transcription  
285 in swine PBMCs (Fig. 15).

286

## 287 **DISCUSSION**

288 A landmark of acute ASF is the severe lymphoid tissue destruction and massive lymphocyte  
289 depletion in infected pigs, which occurs as a result of bystander lymphocyte apoptosis (3, 8, 19).  
290 Since lymphocytes do not support ASFV replication, factors secreted by infected macrophages  
291 have been implicated in triggering lymphocyte apoptosis (16, 19-22). ASFV CD2v is a  
292 glycoprotein with homology to host CD2, an adhesion molecule expressed by T and NK cells (56,  
293 57, 72). CD2v has been shown to be involved in host immunomodulation, virulence and induction  
294 of protective immune responses (55, 75, 88). Here, we show that expression of ASFV CD2v in  
295 swine cells induces NF- $\kappa$ B-mediated IFN expression through interaction with CD58 (Fig. 3, Fig.  
296 5 and Fig. 9). We observed that treatment of swine PBMC with purified CD2v leads to significant  
297 IFN- $\beta$  induction, NF- $\kappa$ B-p65 nuclear translocation (Fig. 10A and B), and caspase-3 and PARP1  
298 cleavage, thus providing a mechanism for CD2v-induced lymphocyte apoptosis (Fig. 12).

299 The relationship between ASFV infection and the IFN system is complex. ASFV has evolved  
300 multiple strategies to counteract activation of the IFN and NF- $\kappa$ B signaling pathways (42-45). *In*  
301 *vitro* infection of porcine macrophages with low virulence ASFV strains induced enhanced and  
302 sustained IFN induction compared to virulent strains (46-51). However, acute ASFV infection of  
303 pigs is characterized by high level of systemic IFN production (52, 53). Viral factors involved in  
304 IFN induction and sources of IFN during acute ASF infection remain to be identified. Here, we  
305 describe an immunomodulatory function of ASFV CD2v that, by targeting lymphocytes for  
306 apoptosis, may contribute to the massive lymphocyte depletion observed *in vivo*.

307 CD58/LFA-3 is the natural ligand for host CD2 protein, and CD2-CD58 interaction initiates  
308 cellular kinase signaling (58-67). We show that swine CD58 interacts with CD2v, and that the  
309 interaction is involved in CD2v-mediated IFN- $\beta$  induction through NF- $\kappa$ B-p65 nuclear  
310 translocation (Fig. 7 to 9). Since viral glycoproteins can also induce IFN- $\beta$  through TLR-4/TLR-2  
311 (76-79), involvement of these receptors cannot be ruled out. It will be interesting to determine  
312 whether the CD2v cytoplasmic domain, known to interact with the trans-Golgi network AP-1  
313 factor and actin-binding adaptor protein SH3P7 (73, 80), plays a role in CD2v immunomodulation.

314 In ASFV-infected macrophages, CD2v is processed and thought to be secreted (72-74). Here,  
315 we show for the first time that CD2v is released into the supernatant by CD2v-expressing cells  
316 (Fig. 2B). Previous studies have described the involvement of soluble factor/s in the inhibition of  
317 lymphocyte proliferation in PBMCs infected with ASFV or incubated with cell  
318 extracts/supernatants free of virus (54, 55) and have defined an immunomodulatory role of CD2v  
319 in inhibition of mitogen-induced proliferation of bystander lymphocytes (55). Based on our  
320 findings, secreted CD2v could be mimicking host CD2 by interacting with CD58, thus leading to  
321 induction of IFN- $\beta$  and inhibition of lymphocyte proliferation. Our observation that anti-CD2v  
322 monoclonal antibodies inhibit CD2v-dependent NF- $\kappa$ B-p65 nuclear translocation and IFN- $\beta$   
323 induction further strengthen the immunomodulatory role of secreted CD2v (Fig. 14).

324 The role of CD2v in ASFV virulence is not clearly understood. Infection of pigs with a CD2v  
325 deletion mutant virus resulted in different infection phenotypes depending on the parental virus  
326 strain. CD2v deletion in the Spanish strain BA71 resulted in virus attenuation (75), and the *CD2v*  
327 gene has been found interrupted in some attenuated ASFV strains (82) suggesting a role of CD2v  
328 in virus virulence. In contrast, deletion of *CD2v* in virulent strains Malawi and Georgia 2007 did  
329 not significantly affect virus virulence in pigs (55, 81). Although not essential for viral replication  
330 in pigs, *CD2v* is critical for virus replication in the tick (83, 84). Results here support a role of  
331 ASFV CD2v in viral pathogenesis and virulence by affecting lymphocyte survival.

332 CD2v protein has been implicated in protective immunity. CD2v expression is required for  
333 partial protection conferred by specific vaccine constructs, and two predicted CD2v T-cell epitopes  
334 are speculated to affect protective immunity (85-87). Using ASFV inter-serotypic chimeric viruses  
335 and vaccination/challenge experiments in pigs, serotype-specific CD2v and/or C-type lectin  
336 proteins were shown to be important for protection against homologous ASFV infection (88).  
337 Others, however, have found that inoculation of pigs with the BA71 virus lacking CD2v conferred  
338 protection against parental BA71 (75). This variability likely reflects the differences in the  
339 virulence of the challenge strains used in the experiments. In conclusion, CD2v represents an  
340 important factor contributing to lymphocyte depletion observed during ASFV infection in animals  
341 (Fig. 16).



342

## 343 MATERIALS AND METHODS

344 **Cells.** Porcine kidney cells (PK15) and monkey kidney cells (Vero) were obtained from  
345 American Type Culture Collection (ATCC) and were maintained at 37° C with 5% CO<sub>2</sub> in minimal  
346 essential medium (MEM) supplemented with 10% fetal bovine serum (FBS) (Atlanta Biologicals,  
347 Flowery Branch, GA), 2mM L-glutamine, gentamicin (50 µg/ml), penicillin (100 IU/ml), and  
348 streptomycin (100 µg/ml). Human embryonic kidney (HEK 293T) were cultured in Dulbecco's  
349 modified essential medium (DMEM) supplemented as above.

350 **Plasmids and transfection.** ASFV Congo strain CD2v was synthesized, cloned into pUC57  
351 (Genscript, Piscataway, NJ) and amplified with primers CD2v-Fw (*EcoRI*) (5'-  
352 TAAGGCCTCTGAATTCGCCACCATGATAATTA ACTTATTTTTTTAATATG-3') and  
353 CD2v-Rv (*KpnI*) (5'-CAGAATTCGCGGTACCAATAATTCTATCT ACATGAATAAGCG-3').  
354 The amplified full length *CD2v* gene was cloned into *EcoRI* and *KpnI* sites of pCMV-HA vector  
355 (Clontech, Mountain View, CA) to produce pCD2v-HA, which express C-terminally HA-tagged  
356 CD2v protein (CD2v-HA). To enhance translation efficiency, a Kozak sequence (GCCACC) was  
357 placed in front of the *CD2v* gene. The construct was sequenced to confirm integrity and fidelity.

358 To construct expression plasmids pORFV120-Flag and pORFV113-Flag, ORFV120 and  
359 ORFV113 coding sequences were PCR-amplified from orf virus strain OV-IA82 genome and  
360 cloned into p3xFlag-CMV-10 vector (pFlag) (Clontech).

361 For transfection of cells, Lipofectamine 2000 (Invitrogen) and plasmid DNA were separately  
362 diluted in Opti-MEM medium (Gibco) and incubated for 5 min. Diluted DNA was added to diluted  
363 lipofectamine 2000 (1:1ratio) and incubated for 20 min. Finally, DNA-lipid complex was added  
364 to cells and 5 h after incubation, Opti-MEM medium was replaced with 10% complete growth  
365 media.

366 **Hemadsorption assay.** PK15 cells grown in 6-well plates were mock transfected or transfected  
367 with plasmid (p) CD2v-HA. At 24 h post-transfection (pt), culture media was removed and rinsed  
368 two times with PBS. Transfected cultures were incubated with PBS-washed 1% swine RBC  
369 overnight and observed with microscope (X100).

370 **Swine PBMCs isolation, freezing and culture.** Swine PBMCs were obtained from swine  
371 whole blood through density gradient centrifugation using Sepmate15 (Stem cell technologies)  
372 and lymphocyte separation media (Corning), and frozen in freezing media (50% RPMI-1640, 40%  
373 FBS, 10% DMSO) as described elsewhere (68, 69). Swine PBMC were maintained at 37° C with  
374 5% CO<sub>2</sub> in RPMI 1640 medium (Corning) supplemented with 10% fetal bovine serum (FBS)  
375 (Atlanta Biologicals, Flowery Branch, GA), 2mM L-glutamine, gentamicin (50 µg/ml), penicillin  
376 (100 IU/ml), streptomycin (100 µg/ml) and sodium pyruvate (1 mM).

377 **CD2v purification.** For CD2v protein purification, 293T cells were transfected with pCD2v-  
378 HA or pEmpty-HA control vector for 30 h. Cell lysates were harvested using mammalian protein  
379 extraction reagent (MPER) (Thermo Scientific) and incubated with anti-HA resin overnight using  
380 spin columns (Thermo Scientific). Next day, CD2v was eluted using HA peptide (1 mg/ml)  
381 (Thermo Scientific) in TBS buffer (Corning). Whole cell lysates obtained from two 6-well plates  
382 were incubated with 100 µl of anti-HA resin, eluted in 200 µl buffer and used for downstream  
383 process.

384 **Monoclonal antibodies against CD2v.** PK15 cells were transfected with pCD2v-HA, and  
385 whole cell lysates obtained 30 h pt. Lysates were incubated overnight with anti-HA antibody (Cell  
386 Signaling Technology) at 4° C, and immunoprecipitated using 50 µl of protein G agarose bead  
387 slurry (Millipore). Monoclonal antibodies recognizing CD2v-HA were generated by immunizing  
388 BALB/c mice with immunoprecipitated CD2v-HA (100 µg/dose). To generate hybridomas,  
389 splenocytes from immunized mice were harvested and processed according to the company's  
390 protocol (STEMCELL technologies/ClonalCell-HY Hybridoma Cloning Kit). Clones were  
391 screened for reactivity against CD2v-HA by IFA using CD2v-HA-transfected PK15 cultures.  
392 Monoclonal antibody titers were estimated by IFA using goat anti-mouse Alexa fluor 488 or 594  
393 as secondary antibody. Mice were maintained at the University of Nebraska-Lincoln (UNL) in  
394 accordance with the guidelines of UNL Institutional Animal Care and Use Committee (IACUC)  
395 and used in accordance with the guidelines of the committees.

396 **Western Blot.** Fifty µg of whole protein cell extracts or 50 µl of cleared culture supernatant  
397 were resolved by SDS-PAGE, blotted to nitrocellulose or PVDF membranes and probed with  
398 primary antibody against HA (Cell Signaling Technology), caspase-3 (9662S; Cell Signaling  
399 Technology), PARP1 (sc-53643; Santa Cruz) or glyceraldehyde-3-phosphate dehydrogenase  
400 (GAPDH) (sc-25778; Santa Cruz). The blots were developed with appropriate HRP-conjugated  
401 secondary antibodies and chemiluminescent reagents (Thermo Scientific), and imaged with  
402 FluorChem R (Protein Simple). Densitometric analysis was performed using ImageJ software and  
403 all readings were normalized to GAPDH values.

404 **Immunoprecipitation.** 293T cells were transfected with pCD2v-HA, and whole cell lysates in  
405 MPER lysis buffer (Thermo Scientific) were obtained at 30 h pt and incubated overnight with the  
406 anti-CD2v monoclonal antibody mix or anti-HA antibody (3724; Cell Signaling Technology). Pull  
407 down products were obtained by eluting in Laemml buffer (Bio-Rad) and analyzed by Western  
408 blot using anti-HA antibody (2367; Cell Signaling Technology).

409 **CD58 siRNA knock-down.** To investigate involvement of CD58-CD2v interaction in CD2v-  
410 mediated IFN-β induction, siRNA knock down experiments were performed using CD58 sense  
411 (S) (CUUCCAGAGCCAGAACUUAU) and anti-sense (AS) (AUAGUUCUGGCUCUG GAAG)  
412 siRNA duplex (Sigma Aldrich). PK15 cultures were transfected with CD58 siRNA (15 nM) and  
413 mission siRNA transfection reagent (Sigma) following the manufacturer's protocol, and  
414 transfected 24 h later with pCD2v-HA or control pEmpty-HA for 6 h. CD58 knock-down was  
415 assessed by comparing transcript levels between cultures transfected with one MISSION siRNA  
416 Universal Negative control (Sigma aldrich) and CD58 siRNA-transfected cultures using RT-PCR.  
417 SYBR primers for swine CD58 were sCD58 FW 5'-ACTTAAACACTGGGTCTGGGC-3' and  
418 sCD58 RV 5'-AAGCTGCAAGGATCAGGCAT-3'.

419 **Real-time PCR.** Interferon-β (IFN-β) and interferon stimulated genes (ISGs) transcription  
420 were assessed in PK15 cells transfected with pCD2v-HA or control plasmids, and in swine PBMCs  
421 treated with purified CD2v or purified control. Total RNA was harvested at various times post  
422 transfection/treatment with RNA-extraction kit (Zymo) and reverse transcribed with MLV-RT  
423 (Invitrogen) as previously described (70). IFN-β and ISGs mRNAs were quantified using ABI and  
424 QuantStudio-3 Real time PCR system (Applied Biosystems, Foster city, CA), Power SYBR Green  
425 PCR Master Mix (Applied Bio) and primers sIFNβFw (5'-AGTGCATCCTCCAAATCGC T-3')  
426 and sIFNβRv (5'-GCTCATGGAAAGAGCTGTGGT-3') for IFN-β mRNA, and sMX1Fw (5'-

427 GGCGTGGGAATCAGTCATG-3'), sMX1Rv (5'-AGGAAGGTCTATGAGGGTCAGATCT-  
428 3'), sOAS1Fw (5'-GAGCTGCAGCGAGACTTCCT-3') and sOAS1Rv (5'-  
429 TGCTTGACAAGGCGGATGA-3') for ISGs *MX1* and *OAS*. Fold change was calculated by  
430 comparison to Empty-HA for each time points. Experiments were conducted with biological  
431 triplicates and at least three technical replicates.

432 **NF- $\kappa$ B nuclear translocation assay.** Involvement of NF- $\kappa$ B in CD2v-mediated upregulation  
433 of IFN- $\beta$  transcription was assessed by nuclear translocation assays in 1- PK15 cells transfected  
434 with pCD2v-HA or control plasmids pORFV120-Flag and pORFV113-Flag, and 2- swine PBMCs  
435 treated with purified CD2v or purified control. Cells were fixed at various times post-transfection  
436 or -treatment, fixed with 2%-4% paraformaldehyde (PFA) (15 min), and permeabilized with 0.2%  
437 triton X100 (10 min). PK15 cells were incubated overnight at 4° C with primary antibody against  
438 HA (2367S; Cell Signaling Technology), control Flag (A00187; Genscript) and total NF- $\kappa$ B (8242;  
439 Cell Signaling Technology), and PBMCs with antibody against total NF- $\kappa$ B. PK15 cells were  
440 washed with PBS and incubated with secondary antibodies, goat anti-mouse Alexa fluor 488  
441 (A11029; Thermo Scientific) to detect CD2v, ORFV120 and ORFV113, and goat anti-rabbit Alexa  
442 fluor 594 (A11012; Thermo Scientific) to detect total NF- $\kappa$ B; for PBMCs, goat anti-mouse Alexa  
443 fluor 488. PBMCs were deposited on slides using Shandon cytopspin 2 centrifuge (1500 rpm, 1  
444 min). Nuclei were counterstained with DAPI. Images were obtained with a A1 Nikon confocal  
445 microscope, and the number of cells exhibiting nuclear NF- $\kappa$ B staining was determined in  
446 randomly selected fields and results were expressed as mean percentage of cells with nuclear NF-  
447  $\kappa$ B over three independent experiments.

448 To assess whether inhibition of NF- $\kappa$ B affects IFN- $\beta$  induction by CD2v, PK15 cells were  
449 pretreated with the NF- $\kappa$ B inhibitor parthenolide (InvivoGen) at 1 $\mu$ M final concentration or  
450 vehicle control (DMSO) for one hour and transfected with pCD2v-HA in presence or absence of  
451 parthenolide (1  $\mu$ M). At 3 h pt, cultures were fixed, permeabilized, and incubated with primary  
452 antibodies against HA and total NF- $\kappa$ B as above, washed, and incubated with secondary  
453 antibodies, goat anti-mouse Alexa fluor 488 for CD2v and goat anti-rabbit Alexa fluor 594 for  
454 total NF- $\kappa$ B. Cells were counterstained with DAPI and percentage NF- $\kappa$ B nuclear translocation in  
455 CD2v expressing cells in presence or absence of inhibitor were compared over three independent  
456 experiments.

457 The role of CD2v-CD58 interaction in induction of NF- $\kappa$ B nuclear translocation was examined  
458 by transfecting PK15 cells with CD58 siRNA or siRNA universal negative control for 24 h, and  
459 with pCD2v-HA 24 h later for 3 h. Cultures were fixed, permeabilized and processed for HA and  
460 total NF- $\kappa$ B staining as described above. Percentage of NF- $\kappa$ B nuclear translocation in CD2v-  
461 expressing cells in which CD58 was knocked down were determined and compared in three  
462 independent experiments.

463 To investigate the effect of anti-CD2v monoclonal antibody mix in CD2v-induced NF- $\kappa$ B  
464 activation in swine PBMCs, purified CD2v or purified control were incubated overnight at 4° C  
465 with anti-CD2v monoclonal antibodies or anti-ORFV086 antibody or anti-IgG mouse isotype  
466 antibody control. PBMCs grown in 96-well plates were treated with pre-incubated CD2v or non-  
467 preincubated CD2v control, processed as above for NF- $\kappa$ B nuclear translocation 1.5 h post  
468 treatment, cytopspinned, and examined under the confocal microscope. Fields were randomly

469 selected and scored for mean percentage of cells containing nuclear NF- $\kappa$ B over three independent  
470 experiments.

471 **Interferon Bioassay.** To investigate the functional significance of CD2v-induced IFN- $\beta$  and  
472 ISGs expression, the antiviral state of cells was examined using an IFN bioassay. PK15 cells were  
473 transfected with pCD2v-HA or control plasmids pEmpty-HA or pORFV120-Flag, infected at 12  
474 h, 24 h and 30 h pt with reporter vesicular stomatitis virus expressing GFP (VSV<sup>GFP</sup>; 50 PFU/well),  
475 fixed with 4% PFA at 16 h post infection, and examined by IFA in a Leica DMI 4000B.

476 Supernatant obtained from PK15 cultures transfected with pCD2v-HA or control plasmids  
477 pEmpty-HA or pORFV120-Flag or Poly I:C (+ control) were serially diluted and used to treat  
478 PK15 cells. At 30 h post-treatment, cultures were infected with VSV<sup>GFP</sup> (50 PFU/well), and virus  
479 replication was assessed 16 h post-infection.

480 The antiviral state was assessed in swine lymphocytes as follows. Supernatants from swine  
481 PBMCs treated with purified CD2v or purified control for 24 h or supernatant obtained PK15  
482 culture transfected with Poly I:C (+ control) were serially diluted and used to treat fresh PK15  
483 cells. PK15 cells were infected with VSV<sup>GFP</sup> (50 PFU/well) 24 h post treatment, and virus  
484 replication was examined 16 h post infection as described.

485 **Flow cytometry.** PK15 cells were transfected with pCD2v-HA or control plasmids, and then  
486 infected with VSV<sup>GFP</sup> at 12 h, 24 h and 30 h pt. At 16 h post infection, cells were trypsinized, fixed  
487 with 2% PFA, and washed. GFP mean fluorescence intensity (MFI) was measured using Cytex  
488 Aurora flow cytometer (Cytex Biosciences, Fremont CA).

489 CD2v activation of the NF- $\kappa$ B pathway was further examined using flow cytometry assay.  
490 PK15 cells were transfected with pCD2v-HA or pORFV113-Flag, fixed with 2% PFA at 3 h pt,  
491 permeabilized with 0.2% Triton-X100 and incubated with anti-HA (2367S; Cell Signaling  
492 Technology), anti-Flag (A00187; Genscript) or anti-phosphorylated NF- $\kappa$ B (S536) (3033S; Cell  
493 Signaling Technology) for 45 min on ice. Secondary antibodies were goat anti-rabbit Alexa fluor  
494 488 (A11008; Thermo Scientific) for pNF- $\kappa$ B (S536) and goat anti-mouse Alexa fluor 647  
495 (A21236; Thermo Scientific) for CD2v and ORFV113. pNF- $\kappa$ B (S536) mean fluorescence  
496 intensity (MFI) was examined in cells expressing CD2v or ORFV113.

497 **Co-immunoprecipitation.** To study the interaction between CD2v and CD58, PK15 cells were  
498 co-transfected with pEmpty-HA and pCD58-Flag or pCD2v-HA and pCD58-Flag. Whole cell  
499 extracts were prepared at 8 h pt using RIPA lysis buffer (Thermo Scientific). Reciprocal co-  
500 immunoprecipitations were performed using active motif Co-IP kit (Active Motif, Carlsbad, CA)  
501 in moderate stringency buffer ( IP High buffer [Active Motif] and Protease inhibitor cocktail  
502 [Sigma], without detergent and salt) following the manufacturer's protocol. Whole cell extracts  
503 were incubated with HA (3724S; Cell Signaling Technology) and Flag (A00187; Genscript)  
504 antibodies overnight at 4° C, and then pre-washed with 50  $\mu$ l of protein G agarose bead slurry  
505 (Millipore) at 4° C for 2 h. Beads were washed four times with moderate stringency buffer and  
506 bound proteins were eluted in Laemmli buffer. Whole cell protein extracts and immunoprecipitated  
507 products were examined by SDS-PAGE-Western blot with the appropriate antibodies.

508 Interaction of CD2v with endogenous human CD58 was evaluated in 293T cells transfected  
509 with pCD2v-HA. Reciprocal co-immunoprecipitation was performed using anti-HA (3724S; Cell  
510 Signaling Technology) and hu-CD58 (sc20009; Santa Cruz) antibodies following the  
511 manufacturer's protocol (Active motif Co-IP kit). Immunoprecipitated products were examined

512 by SDS-PAGE-Western blot with the appropriate antibodies (7074; Cell Signaling Technology,  
513 7076; Cell Signaling Technology).

514 **Co-localization assays.** CD2v-CD58 interaction was examined by confocal microscopy. PK15  
515 cells were co-transfected with pCD2v-HA and pCD58-Flag, fixed with 4% PFA 24 h pt,  
516 permeabilized with 0.2% Triton-X 100 and treated with anti-HA (3724S; Cell Signaling  
517 Technology) or anti-Flag (A00187; Genscript) primary antibodies. Cells were then washed with  
518 PBS and incubated with goat anti rabbit Alexa fluor 594 (A11012; Cell signaling Technology) and  
519 anti-mouse Alexa fluor 488 goat (A11029; Cell Signaling Technology) secondary antibodies for  
520 1 h. Nuclei were stained with DAPI, and images obtained using A1 Nikon confocal microscope.  
521 Similarly, co-localization of CD2v with endogenous human CD58 was investigated in 293T cells.  
522 Cells were transfected with pCD2v-HA and IFA was performed using anti-HA (3724S; Cell  
523 Signaling Technology) and anti-CD58 (sc20009; Santa Cruz) primary antibodies, and goat anti  
524 rabbit Alexa fluor 594 (A11012; Cell Signaling Technology) and anti-mouse Alexa fluor 488 goat  
525 (A11029) secondary antibodies.

526 **Statistics.** All statistical analyses were performed using student's t test. Statistically significant  
527 difference were indicated as \*,  $P < 0.05$ ; \*\*,  $P < 0.01$  and NS, not significant.

528

## 529 ACKNOWLEDGEMENTS

530 This work was funded by National Pork Board (grant 13-102) and by the USDA National  
531 Institute of Food and Agriculture (grant 2013 – 67015-21335).

532 We thank Hiep Vu (Nebraska Center for Virology, University of Nebraska-Lincoln) for his  
533 advice and assistance in generating monoclonal antibodies, Fernando A. Osorio (Nebraska Center  
534 for Virology, University of Nebraska-Lincoln) for laboratory support, James F. Lowe (College of  
535 Veterinary medicine at University of Illinois at Urbana-Champaign) and Anna Carol Dilger  
536 (Department of Animal Sciences at University of Illinois at Urbana-Champaign) for providing  
537 swine blood.

538

539

540

## 541 REFERENCES

- 542 1. Montgomery RE. 1921. On A Form of Swine Fever Occurring in British East Africa  
543 (Kenya Colony). *J Comp Pathol Ther* 34:159–191.
- 544 2. Detray D. 1957. Persistence of viremia and immunity in African swine fever. *Am J Vet*  
545 *Res* 18:811–816.
- 546 3. Oura CA, Powell PP, Anderson E, Parkhouse RM. 1998. The pathogenesis of African  
547 swine fever in the resistant bushpig. *J Gen Virol* 79:1439–1443.
- 548 4. Anderson EC, Hutchings GH, Mukarati N, Wilkinson PJ. 1998. African swine fever virus  
549 infection of the bushpig (*Potamochoerus porcus*) and its significance in the epidemiology  
550 of the disease. *Vet Microbiol* 62:1–15.
- 551 5. Gómez-Villamandos JC, Bautista MJ, Sánchez-Cordón PJ, Carrasco L. 2013. Pathology  
552 of African swine fever: The role of monocyte-macrophage. *Virus Res* 173:140–149.
- 553 6. Moulton J, Coggins L. 1968. Comparison of lesions in acute and chronic African swine  
554 fever. *Cornell Vet* 58:364–388.
- 555 7. Blome S, Gabriel C, Beer M. 2013. Pathogenesis of African swine fever in domestic pigs

- 556 and European wild boar. *Virus Res* 173:122–130.
- 557 8. Ramiro-Ibáñez F, Ortega A, Brun A, Escribano JM, Alonso C. 1996. Apoptosis: A  
558 mechanism of cell killing and lymphoid organ impairment during acute African swine  
559 fever virus infection. *J Gen Virol* 77:2209–2219.
- 560 9. Carrasco L, Bautista MJ, Gómez-Villamandos JC, De Las Mulas JM, De Lara FCM,  
561 Wilkinson PJ, Sierra MA. 1997. Development of microscopic lesions in splenic cords of  
562 pigs infected with African swine fever virus. *Vet Res* 28:93–99.
- 563 10. Wilkinson PJ, Wardley RC, Williams SM. 1981. African swine fever virus (Malta/78) in  
564 pigs. *J Comp Pathol* 91:277–284.
- 565 11. Wardley RC, Hamilton F, Wilkinson PJ. 1979. The replication of virulent and attenuated  
566 strains of African swine fever virus in porcine macrophages. *Arch Virol* 61:217–225.
- 567 12. Mebus C. 1988. African swine fever. *Adv Virus Res* 35:251–269.
- 568 13. Carrillo C, Borca M V, Afonso CL, Onisk D V, Rock DL. 1994. Long-term persistent  
569 infection of swine monocytes/macrophages with African swine fever virus. *J Virol*  
570 68:580–3.
- 571 14. Muñoz-Moreno R, Galindo I, Cuesta-Gejjo MÁ, Barrado-Gil L, Alonso C. 2015. Host cell  
572 targets for African swine fever virus. *Virus Res* 209:118–127.
- 573 15. Carrasco L, Chacón-M De Lara F, Martín De Las Mulas J, Gómez-Villamandos JC,  
574 Hervás J, Wilkinson PJ, Sierra MA. 1996. Virus association with lymphocytes in acute  
575 African swine fever. *Vet Res* 27:305–312.
- 576 16. Carrasco L, Chacon-M. de Lara F, Martin de las Mulas J, Gomez-Villamandos JC, Perez  
577 J, Wilkinson PJ, Sierra MA. 1996. Apoptosis in lymph nodes in acute African swine fever.  
578 *J Comp Pathol* 115:415–428.
- 579 17. Gómez-Villamandos JC, Hervás J, Mendéz A, Carrasco L, Villeda CJ, Wilkinson PJ,  
580 Sierra MA. 1995. A pathological study of the perisinusoidal unit of the liver in acute  
581 African swine fever. *Res Vet Sci* 59:146–151.
- 582 18. Gómez-Villamandos JC, Hervás J, Moreno C, Carrasco L, Bautista MJ, Caballero JM,  
583 Wilkinson PJ, Sierra MA. 1997. Subcellular changes in the tonsils of pigs infected with  
584 acute African swine fever virus. *Vet Res* 28:179–189.
- 585 19. Salguero FJ, Sánchez-Cordón PJ, Núñez A, Fernández de Marco M, Gómez-Villamandos  
586 JC. 2005. Proinflammatory cytokines induce lymphocyte apoptosis in acute African swine  
587 fever infection. *J Comp Pathol* 132:289–302.
- 588 20. Gomez-Villamandos JC, Hervas J, Mendez A, Carrasco L, De las Mulas JM, Villeda CJ,  
589 Wilkinson PJ, Sierra MA. 1995. Experimental African swine fever: Apoptosis of  
590 lymphocytes and virus replication in other cells. *J Gen Virol* 76:2399–2405.
- 591 21. Gómez del Moral M, Ortuño E, Fernández-Zapatero P, Alonso F, Alonso C, Ezquerro A,  
592 Domínguez J. 1999. African swine fever virus infection induces tumor necrosis factor  
593 alpha production: implications in pathogenesis. *J Virol* 73:2173–2180.
- 594 22. Salguero FJ, Ruiz-Villamor E, Bautista MJ, Sánchez-Cordón PJ, Carrasco L, Gómez-  
595 Villamandos JC. 2002. Changes in macrophages in spleen and lymph nodes during acute  
596 African swine fever: Expression of cytokines. *Vet Immunol Immunopathol* 90:11–22.
- 597 23. Fensterl V, Sen GC. 2009. Interferons and viral infections. *BioFactors* 35:14–20.
- 598 24. Fensterl V, Chattopadhyay S, Sen GC. 2015. No Love Lost Between Viruses and  
599 Interferons. *Annu Rev Virol* 2:549–572.
- 600 25. McNab F, Mayer-Barber K, Sher A, Wack A, O’Garra A. 2015. Type I interferons in  
601 infectious disease. *Nat Rev Immunol* 15:87–103.

- 602 26. Katze MG, He Y, Gale M. 2002. Viruses and interferon: A fight for supremacy. *Nat Rev*  
603 *Immunol* 2:675–687.
- 604 27. Nan Y, Nan G, Zhang YJ. 2014. Interferon induction by RNA viruses and antagonism by  
605 viral pathogens. *Viruses* 6:4999–5027.
- 606 28. Kim TK, Maniatis T. 1997. The mechanism of transcriptional synergy of an in vitro  
607 assembled interferon- $\beta$  enhanceosome. *Mol Cell* 1:119–129.
- 608 29. Lenardo MJ, Fan CM, Maniatis T, Baltimore D. 1989. The involvement of NF- $\kappa$ B in  $\beta$ -  
609 interferon gene regulation reveals its role as widely inducible mediator of signal  
610 transduction. *Cell* 57:287–294.
- 611 30. Thanos D, Maniatis T. 1995. Identification of the rel family members required for virus  
612 induction of the human beta interferon gene. *Mol Cell Biol* 15:152–164.
- 613 31. Sato M, Suemori H, Hata N, Asagiri M, Ogasawara K, Nakao K, Nakaya T, Katsuki M,  
614 Noguchi S, Tanaka N, Taniguchi T. 2000. Distinct and essential roles of transcription  
615 factors IRF-3 and IRF-7 in response to viruses for IFN- $\alpha/\beta$  gene induction. *Immunity*  
616 13:539–548.
- 617 32. Honda K, Takaoka A, Taniguchi T. 2006. Type I Inteferon Gene Induction by the  
618 Interferon Regulatory Factor Family of Transcription Factors. *Immunity* 25:349–360.
- 619 33. Chen L, Greene WC. 2004. Shaping the nuclear action of NF-kappaB. *Nat Rev Mol Cell*  
620 *Biol* 5:392–401.
- 621 34. Perkins ND. 2007. Integrating cell-signalling pathways with NF-  $\kappa$  B and IKK function.  
622 *Nat Rev Mol Cell Biol* 8:49–62.
- 623 35. Scheidereit C. 2006. IkappaB kinase complexes: gateways to NF-kappaB activation and  
624 transcription. *Oncogene* 25:6685–6705.
- 625 36. Baeuerle PA, Baltimore D. 1988. I $\kappa$ B: A specific inhibitor of the NF- $\kappa$ B transcription  
626 factor. *Science* 242:540–546.
- 627 37. Li C-CH, Dai R-M, Longo DL. 1995. Inactivation of NF-kB Inhibitor I $\kappa$ B: Ubiquitin-  
628 Dependent Proteolysis and its Degredation Product. *Biochem Biophys Res Commun*  
629 215:292–2301.
- 630 38. Moschonas A, Ioannou M, Eliopoulos AG. 2012. CD40 Stimulates a “Feed-Forward” NF-  
631  $\kappa$ B–Driven Molecular Pathway That Regulates IFN- $\beta$  Expression in Carcinoma Cells. *J*  
632 *Immunol* 188:5521–5527.
- 633 39. Balachandran S, Beg AA. 2011. Defining emerging roles for NF- $\kappa$ B in antiviral  
634 responses: Revisiting the interferon- $\beta$  Enhanceosome paradigm. *PLoS Pathog* 7:1–4.
- 635 40. Bertolusso R, Tian B, Zhao Y, Vergara L, Sabree A, Iwanaszko M, Lipniacki T, Brasier  
636 AR, Kimmel M. 2014. Dynamic cross talk model of the epithelial innate immune response  
637 to double-stranded RNA stimulation: Coordinated dynamics emerging from cell-level  
638 noise. *PLoS One* 9.
- 639 41. Zhao J, He S, Minassian A, Li J, Feng P. 2015. Recent advances on viral manipulation of  
640 NF- $\kappa$ B signaling pathway. *Curr Opin Virol* 15:103–111.
- 641 42. de Oliveira VL, Almeida SCP, Soares HR, Crespo A, Marshall-Clarke S, Parkhouse RM.  
642 2011. A novel TLR3 inhibitor encoded by African swine fever virus (ASFV). *Arch Virol*  
643 156:597–609.
- 644 43. Correia S, Ventura S, Parkhouse RM. 2013. Identification and utility of innate immune  
645 system evasion mechanisms of ASFV. *Virus Res* 173:87–100.
- 646 44. Wang X, Wu J, Wu Y, Chen H, Zhang S, Li J, Xin T, Jia H, Hou S, Jiang Y, Zhu H, Guo  
647 X. 2018. Inhibition of cGAS-STING-TBK1 signaling pathway by DP96R of ASFV China

- 648 2018/1. *Biochem Biophys Res Commun* 506:437–443.
- 649 45. Revilla Y, Callejo M, Rodri JM, Culebras E, Nogal L, Salas L, Vin E, Fresno M. 1998.
- 650 Inhibition of nuclear factor kappaB activation by a virus-encoded IkappaB-like protein. *J*
- 651 *Biol Chem* 273:5405–5411.
- 652 46. Afonso CL, Piccone ME, Zaffuto KM, Neilan J, Kutish GF, Lu Z, Balinsky CA, Gibb TR,
- 653 Bean TJ, Zsak L, Rock DL. 2004. African swine fever virus multigene family 360 and
- 654 530 genes affect host interferon response. *J Virol* 78:1858-1864.
- 655 47. Gil S, Sepúlveda N, Albina E, Leitão A, Martins C. 2008. The low-virulent African swine
- 656 fever virus (ASFV/NH/P68) induces enhanced expression and production of relevant
- 657 regulatory cytokines (IFN $\alpha$ , TNF $\alpha$  and IL12p40) on porcine macrophages in comparison
- 658 to the highly virulent ASFV/L60. *Arch Virol* 153:1845–1854.
- 659 48. Zhang F, Hopwood P, Abrams CC, Downing A, Murray F, Talbot R, Archibald A,
- 660 Lowden S, Dixon LK. 2006. Macrophage transcriptional responses following in vitro
- 661 infection with a highly virulent African swine fever virus isolate. *J Virol* 80:10514-10521.
- 662 49. García-Belmonte R, Pérez-Núñez D, Pittau M, Richt JA, Revilla Y. 2019. African Swine
- 663 Fever Virus Armenia/07 Virulent Strain Controls Interferon Beta Production through the
- 664 cGAS-STING Pathway. *J Virol* 93:1–17.
- 665 50. Portugal R, Leitão A, Martins C. 2018. Modulation of type I interferon signaling by
- 666 African swine fever virus (ASFV) of different virulence L60 and NHV in macrophage
- 667 host cells. *Vet Microbiol* 216:132–141.
- 668 51. Reis AL, Abrams CC, Goatley LC, Netherton C, Chapman DG, Sanchez-Cordon P, Dixon
- 669 LK. 2016. Deletion of African swine fever virus interferon inhibitors from the genome of
- 670 a virulent isolate reduces virulence in domestic pigs and induces a protective response.
- 671 *Vaccine* 34:4698–4705.
- 672 52. Karalyan Z, Zakaryan H, Sargsyan K, Voskanyan H, Arzumanyan H, Avagyan H,
- 673 Karalova E. 2012. Interferon status and white blood cells during infection with African
- 674 swine fever virus in vivo. *Vet Immunol Immunopathol* 145:551–555.
- 675 53. Golding JP, Goatley L, Goodbourn S, Dixon LK, Taylor G, Netherton CL. 2016.
- 676 Sensitivity of African swine fever virus to type I interferon is linked to genes within
- 677 multigene families 360 and 505. *Virology* 493:154–161.
- 678 54. González S, Mendoza C, Sánchez-Vizcaino JM, Alonso F. 1990. Inhibitory effect of
- 679 African swine fever virus on lectin-dependent swine lymphocyte proliferation. *Vet*
- 680 *Immunol Immunopathol* 26:71–80.
- 681 55. Borca M V, Carrillo C, Zsak L, Laegreid WW, Kutish GF, Neilan JG, Burrage TG, Rock
- 682 DL. 1998. Deletion of a CD2-like gene, 8-DR, from African swine fever virus affects viral
- 683 infection in domestic swine. *J Virol* 72:2881–2889.
- 684 56. Rodríguez JM, Yáñez RJ, Almazán F, Viñuela E, Rodríguez JF. 1993. African swine fever
- 685 virus encodes a CD2 homolog responsible for the adhesion of erythrocytes to infected
- 686 cells. *J Virol* 67:5312–5320.
- 687 57. Borca M V., Kutish GF, Afonso CL, Irusta P, Carrillo C, Brun A, Sussman M, Rock DL.
- 688 1994. An African Swine Fever Virus Gene with Similarity to the T-Lymphocyte Surface
- 689 Antigen CD2 Mediates Hemadsorption. *Virology* 199:463-468.
- 690 58. Bockenstedt LK, Goldsmith MA, Dustin M, Olive D, Springer TA, Weiss A. 1988. The
- 691 CD2 ligand LFA-3 activates T cells but depends on the expression and function of the
- 692 antigen receptor. *J Immunol* 141:1904–1911.
- 693 59. Satiimul T. 1988. Accessory Cell-Dependent T-Cell Activation via Involvement of CD2-



- 694 LFA-3 Interactions. *Scand J Immunol* 28:277-284.
- 695 60. Karmann K, Hughes CCW, Fanslow WC, Pober JS. 1996. Endothelial cells augment the  
696 expression of CD40 ligand on newly activated human CD4<sup>+</sup>T cells through a CD2/LFA-3  
697 signaling pathway. *Eur J Immunol* 26:610–617.
- 698 61. Diaz-Sanchez D, Chegini S, Zhang K, Saxon A. 2018. CD58 (LFA-3) stimulation  
699 provides a signal for human isotype switching and IgE production distinct from CD40. *J*  
700 *Immunol* 153:10–20.
- 701 62. King PD, Sadra A, Han A, Liu XR, Sunder-Plassmann R, Reinherz EL, Dupont B. 1996.  
702 CD2 signaling in T cells involves tyrosine phosphorylation and activation of the Tec  
703 family kinase, EMT/ITK/TSK. *Int Immunol* 8:1707–1714.
- 704 63. Lin H, Hutchcroft JE, Andoniou CE, Kamoun M, Band H, Bierer BE. 1998. Association  
705 of p59 fyn with the T Lymphocyte Costimulatory Receptor CD2. Binding of the Fyn Src  
706 homology (SH)3 domain is regulated by the Fyn SH2 domain. *J Biol Chem* 273:19914–  
707 19921.
- 708 64. Le Guiner S, Le Dréan E, Labarrière N, Fonteneau JF, Viret C, Diez E, Jotereau F. 1998.  
709 LFA-3 co-stimulates cytokine secretion by cytotoxic T lymphocytes by providing a TCR-  
710 independent activation signal. *Eur J Immunol* 28:1322-1331.
- 711 65. Meinel E, Lengenfelder D, Blank N, Pirzer R, Barata L, Hivroz C. 2000. Differential  
712 Requirement of ZAP-70 for CD2-Mediated Activation Pathways of Mature Human T  
713 Cells. *J Immunol* 165:3578–3583.
- 714 66. Ariel O, Levi Y, Hollander N. 2009. Signal transduction by CD58: the transmembrane  
715 isoform transmits signals outside lipid rafts independently of the GPI-anchored isoform.  
716 *Cell Signal* 21:1100-1108.
- 717 67. Skånland SS, Moltu K, Berge T, Aandahl EM, Taskén K. 2014. T-cell co-stimulation  
718 through the CD2 and CD28 co-receptors induces distinct signalling responses. *Biochem J*  
719 460:399–410.
- 720 68. Meier WA, Galeota J, Osorio FA, Husmann RJ, Schnitzlein WM, Zuckermann FA. 2003.  
721 Gradual development of the interferon- $\gamma$  response of swine to porcine reproductive and  
722 respiratory syndrome virus infection or vaccination. *Virology* 309:18–31.
- 723 69. Parida R, Choi IS, Peterson DA, Pattnaik AK, Laegreid W, Zuckermann FA, Osorio FA.  
724 2012. Location of T-cell epitopes in nonstructural proteins 9 and 10 of type-II porcine  
725 reproductive and respiratory syndrome virus. *Virus Res* 169:13–21.
- 726 70. Diel DG, Delhon G, Luo S, Flores EF, Rock DL. 2010. A Novel Inhibitor of the NF- $\kappa$ B  
727 Signaling Pathway Encoded by the Parapoxvirus Orf Virus. *J Virol* 84:3962–3973.
- 728 71. Malogolovkin A, Burmakina G, Tulman ER, Delhon G, Diel DG, Salnikov N, Kutish GF,  
729 Kolbasov D, Rock DL. 2015. African swine fever virus CD2v and C-type lectin gene loci  
730 mediate serological specificity. *J Gen Virol* 96:866–873.
- 731 72. Goatley LC, Dixon LK. 2011. Processing and Localization of the African Swine Fever  
732 Virus CD2v Transmembrane Protein. *J Virol* 85:3294–3305.
- 733 73. Kay-Jackson PC, Goatley LC, Cox L, Miskin JE, Parkhouse RM, Wienands J, Dixon LK.  
734 2004. The CD2v protein of African swine fever virus interacts with the actin-binding  
735 adaptor protein SH3P7. *J Gen Virol* 85:119–130.
- 736 74. Ruíz-Gonzalvo F, Coll JM. 1993. Characterization of a soluble hemagglutinin induced in  
737 African swine fever virus-infected cells. *Virology* 196:769-777.
- 738 75. Monteagudo PL, Lacasta A, López E, Bosch L, Collado J, Pina-pedrero S, Correa-fiz F,  
739 Accensi F. 2017. A71 $\Delta$ CD2: a New Recombinant Live Attenuated African Swine Fever

- 740 Virus with Cross-Protective Capabilities. *J Virol* 91:1–17.
- 741 76. Barbalat R, Lau L, Locksley RM, Barton GM. 2009. Toll-like receptor 2 on inflammatory  
742 monocytes induces type I interferon in response to viral but not bacterial ligands. *Nat*  
743 *Immunol* 10:1200–1209.
- 744 77. Bauernfeind F, Hornung V. 2009. Tlr2 joins the interferon gang. *Nat Immunol* 10:1139–  
745 1141.
- 746 78. Kurt-Jones EA, Popova L, Kwinn L, Haynes LM, Jones LP, Tripp RA, Walsh EE,  
747 Freeman MW, Golenbock DT, Anderson LJ, Finberg RW. 2000. Pattern recognition  
748 receptors TLR4 and CD14 mediate response to respiratory syncytial virus. *Nat Immunol*  
749 1:398–401.
- 750 79. Georgel P, Jiang Z, Kunz S, Janssen E, Mols J, Hoebe K, Bahram S, Oldstone MBA,  
751 Beutler B. 2007. Vesicular stomatitis virus glycoprotein G activates a specific antiviral  
752 Toll-like receptor 4-dependent pathway. *Virology* 362:304–313.
- 753 80. Pérez-Núñez D, García-Urdiales E, Martínez-Bonet M, Nogal ML, Barroso S, Revilla Y,  
754 Madrid R. 2015. CD2v interacts with Adaptor Protein AP-1 during African swine fever  
755 infection. *PLoS One* 10:1–19.
- 756 81. Borca MV, O'Donnell V, Holinka LG, Risatti GR, Ramirez-Medina E, Vuono EA, Shi J,  
757 Pruitt S, Rai A, Silva E, Velazquez-Salinas L, Gladue DP. 2020. Deletion of CD2-like  
758 gene from the genome of African swine fever virus strain Georgia does not attenuate  
759 virulence in swine. *Sci Rep* 10:1–8.
- 760 82. Chapman DAG, Tcherepanov V, Upton C, Dixon LK. 2008. Comparison of the genome  
761 sequences of non-pathogenic and pathogenic African swine fever virus isolates. *J Gen*  
762 *Virol* 89:397–408.
- 763 83. Rowlands RJ, Duarte MM, Boinas F, Hutchings G, Dixon LK. 2009. The CD2v protein  
764 enhances African swine fever virus replication in the tick vector, *Ornithodoros erraticus*.  
765 *Virology* 393:319–328.
- 766 84. Kleiboeker SB, Burrage TG, Scoles GA, Fish D, Rock DL. 1998. African swine fever  
767 virus infection in the argasid host, *Ornithodoros porcinus porcinus*. *J Virol* 72:1711–1724.
- 768 85. Argilaguet JM, Pérez-Martín E, Nofrarías M, Gallardo C, Accensi F, Lacasta A, Mora M,  
769 Ballester M, Galindo-Cardiel I, López-Soria S, Escribano JM, Reche PA, Rodríguez F.  
770 2012. DNA Vaccination Partially Protects against African Swine Fever Virus Lethal  
771 Challenge in the Absence of Antibodies. *PLoS One* 7:1–11.
- 772 86. Takamatsu HH, Denyer MS, Lacasta A, Stirling CMA, Argilaguet JM, Netherton CL,  
773 Oura CA, Martins C, Rodríguez F. 2013. Cellular immunity in ASFV responses. *Virus*  
774 *Res* 173:110–121.
- 775 87. Burmakina G, Malogolovkin A, Tulman ER, Xu W, Delhon G, Kolbasov D, Rock DL.  
776 2019. Identification of T-cell epitopes in African swine fever virus CD2v and C-type  
777 lectin proteins. *J Gen Virol* 100:259–265.
- 778 88. Burmakina G, Malogolovkin A, Tulman ER, Zsak L, Delhon G, Diel DG, Shobogorov  
779 NM, Morgunov YP, Morgunov SY, Kutish GF, Kolbasov D, Rock DL. 2016. African  
780 swine fever virus serotype-specific proteins are significant protective antigens for African  
781 swine fever. *J Gen Virol* 97:1670–1675.
- 782
- 783
- 784
- 785

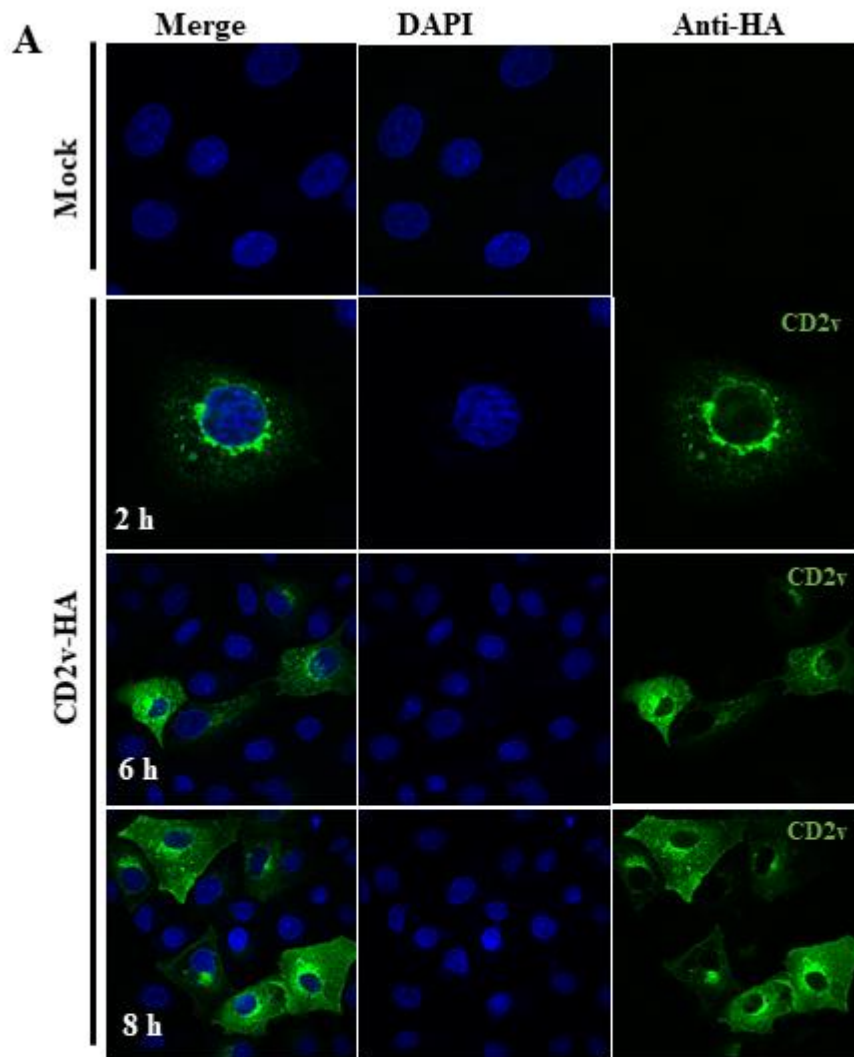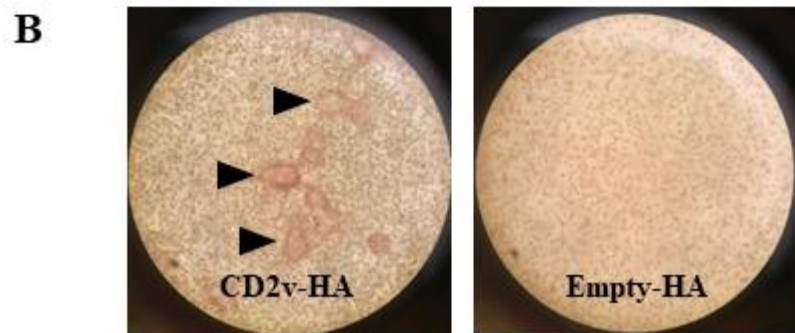

786  
787  
788  
789

790 **FIG 1. Subcellular localization and characterization of ASFV CD2v protein.** (A) PK15 cells  
791 were mock transfected or transfected with a plasmid expressing HA-tagged ASFV CD2v, fixed at  
792 various times post transfection (pt), incubated with anti-HA primary antibody, sequentially  
793 stained with Alexa fluor 488-labeled secondary antibody and DAPI, and examined by confocal  
794 microscopy. Results are representative of two independent experiments. (B) CD2v-HA-  
795 expressing PK15 cells hemadsorbed swine red blood cells (RBCs). PK15 cells were transfected  
796 with plasmid pCD2v-HA for 24 h, incubated with swine RBCs overnight, and observed with the  
797 microscope (X100). CD2v-dependent rosetting is indicated by the arrowheads. Results are  
798 representative of two independent experiments.  
799  
800

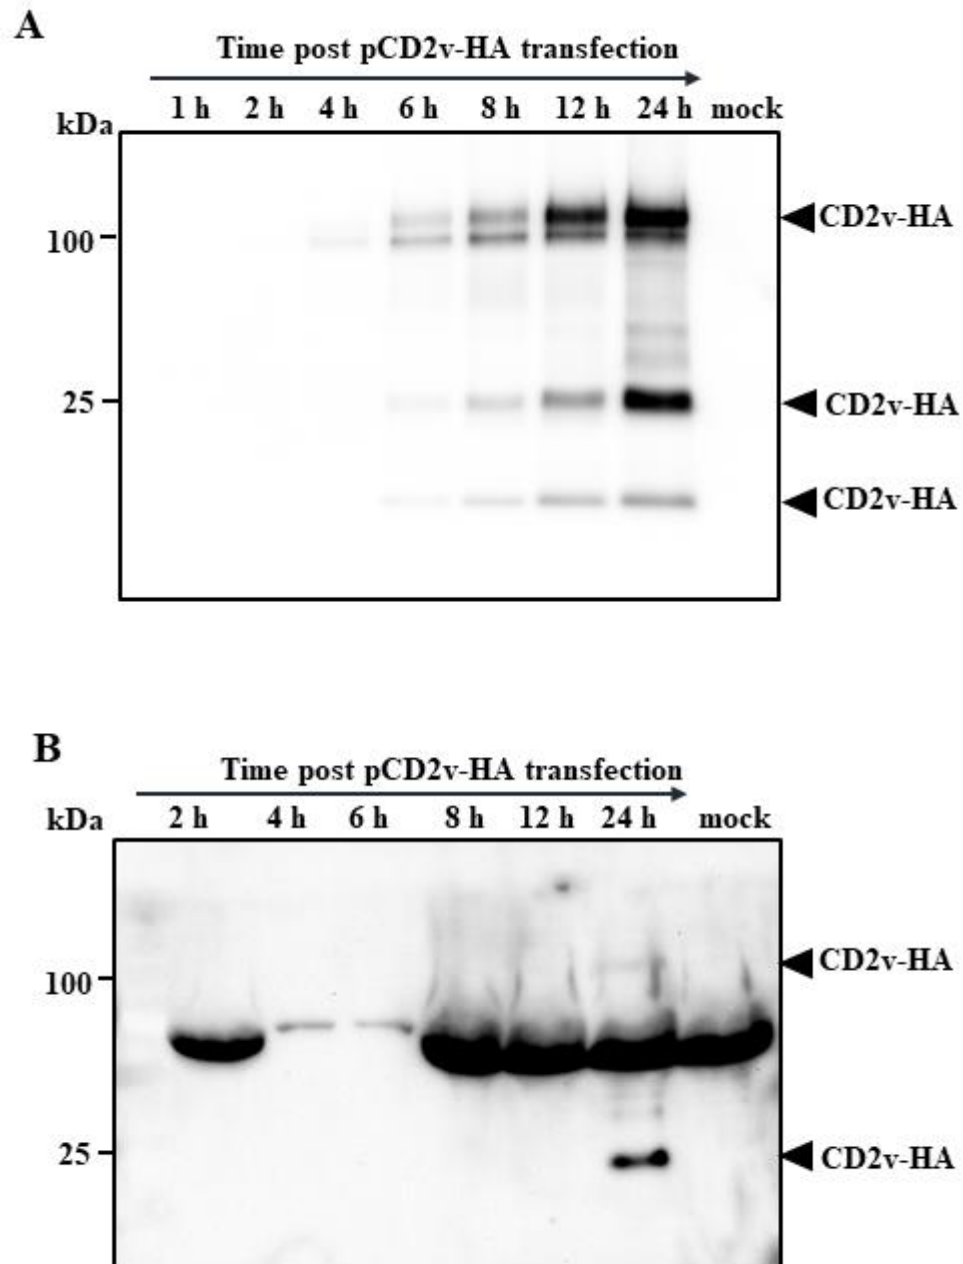

801  
802

803 **FIG 2. Expression kinetics and secretion of CD2v.** (A) PK15 cells mock transfected or  
804 transfected with plasmid pCD2v-HA were harvested at the indicated times post transfection.  
805 Total cell protein extracts were resolved by SDS-PAGE, blotted and incubated with antibodies  
806 against HA. Results are representative of two independent experiments. (B) Detection of CD2v  
807 in culture supernatant of PK15 cells transiently expressing CD2v. PK15 cells were transfected as  
808 above, and supernatants harvested at various times pt. Cleared supernatants (50  $\mu$ l) were resolved  
809 by SDS-PAGE and analyzed by Western blot using antibodies against HA. Results are  
810 representative of two independent experiments.

811

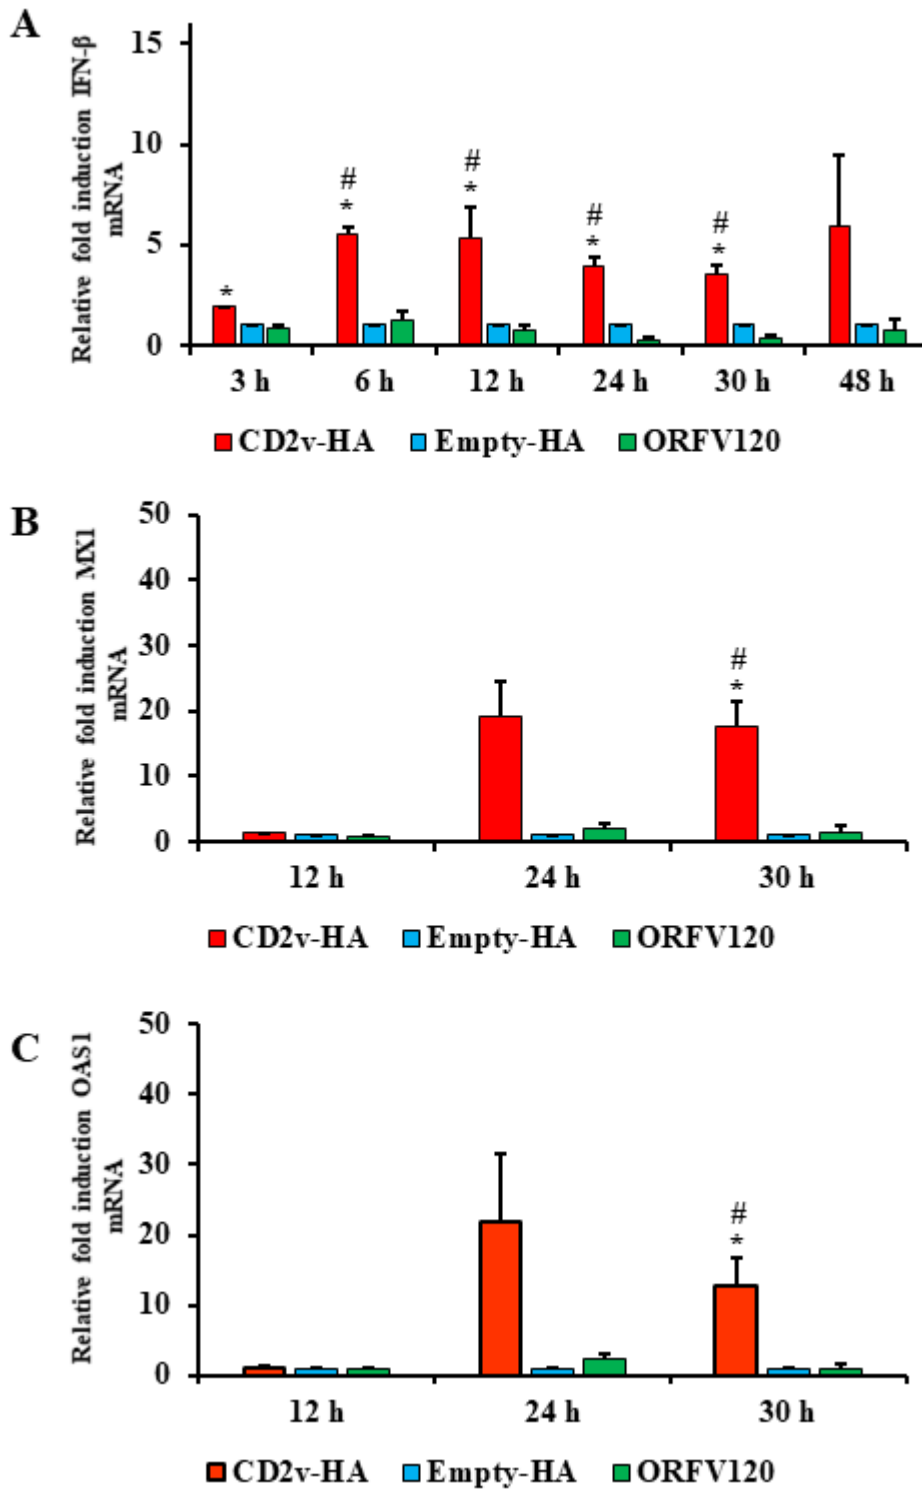

812  
813  
814  
815

816 **FIG 3. Induction of IFN- $\beta$  and ISGs in CD2v-expressing cells.** PK15 cells were transfected  
817 with plasmids pCD2v-HA, pEmpty-HA or pORFV120-Flag, and transcription of IFN-  $\beta$  and  
818 selected ISGs were assessed by real-time PCR. (A) Fold changes of IFN- $\beta$  levels in cells  
819 transfected with pCD2v-HA relative to pEmpty-HA and pORFV120-Flag at various times post  
820 transfection (pt). Results are average mRNA levels from three independent experiments. *P*-  
821 values relative to Empty-HA and ORFV120 were 0.007 and 0.1 (3 h); 0.04 and 0.01 (6 h); 0.016  
822 and 0.017 (12 h); 0.015 and 0.006 (24 h); and 0.019 and 0.006 (30 h), respectively. (B and C)  
823 Fold changes of ISG mRNA levels at 12 h, 24 h and 30 h pt. Results are average mRNA levels  
824 from three independent experiments. *P*-values relative to Empty-HA and ORFV120 at 30 h pt  
825 were 0.02 and 0.018 for *MX1* (B) and 0.04 and 0.037 for *OAS1* (C). \* and # denote statistical  
826 significance compared to Empty-HA and ORFV120, respectively.  
827

**A**

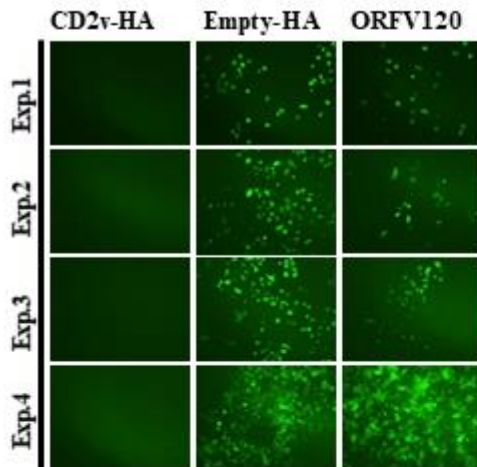

**B**

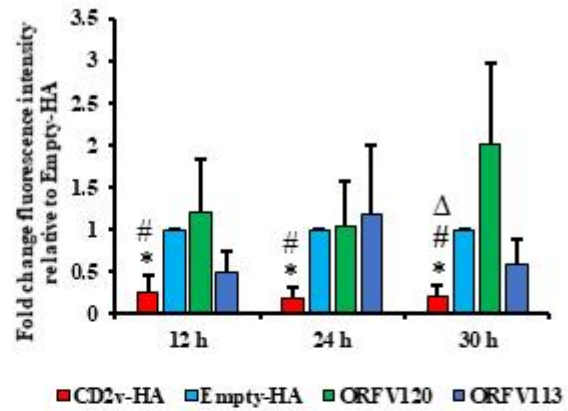

**C**

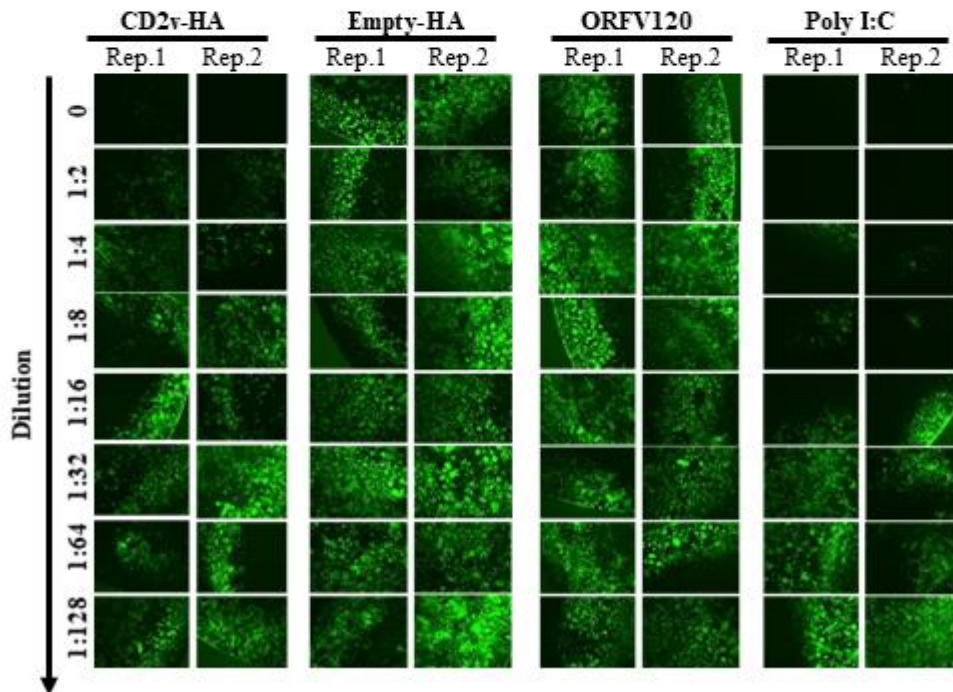

828  
829  
830  
831



832 **FIG 4. Induction of antiviral state in CD2v-expressing cells.** PK15 cells were transfected with  
833 pCD2v-HA, pEmpty-HA, pORFV120-Flag or pORFV113-Flag. At 12 h, 24 h or 30 h post  
834 transfection, cultures were infected with vesicular stomatitis virus expressing GFP (VSV<sup>GFP</sup>, 50  
835 PFU/well). (A) Fluorescence microscopy images taken at 16 h post infection. Note decreased  
836 VSV replication in cells transfected with pCD2v-HA relative to controls. Results representative  
837 of four independent experiments. Exp., denotes experimental replicates. (B) Mean GFP  
838 fluorescence measured by flow cytometry at 16 h post infection. Results are mean values of four  
839 independent experiments. *P*-values relative to transfection with plasmids pEmpty-HA,  
840 pORFV120-Flag and pORFV113-Flag were 0.0064, 0.042 and 0.096 (12 h); 0.0002, 0.041 and  
841 0.07 (24 h); and 0.0002, 0.02 and 0.02 (30 h), respectively. \*, # and Δ denote statistical  
842 significance compared to Empty-HA, ORFV120 and ORFV113, respectively. (C) PK15 cells  
843 were treated with supernatants obtained from cultures transfected with pCD2v-HA, pEmpty-HA  
844 or pORFV120-Flag, or with poly I: C, and infected with VSV<sup>GFP</sup> (50 PFU/well) 30 h post  
845 treatment. Fluorescence microscopy images taken at 16 h post infection are shown. Results  
846 representative of two independent experiments. Rep., denotes technical replicates.  
847

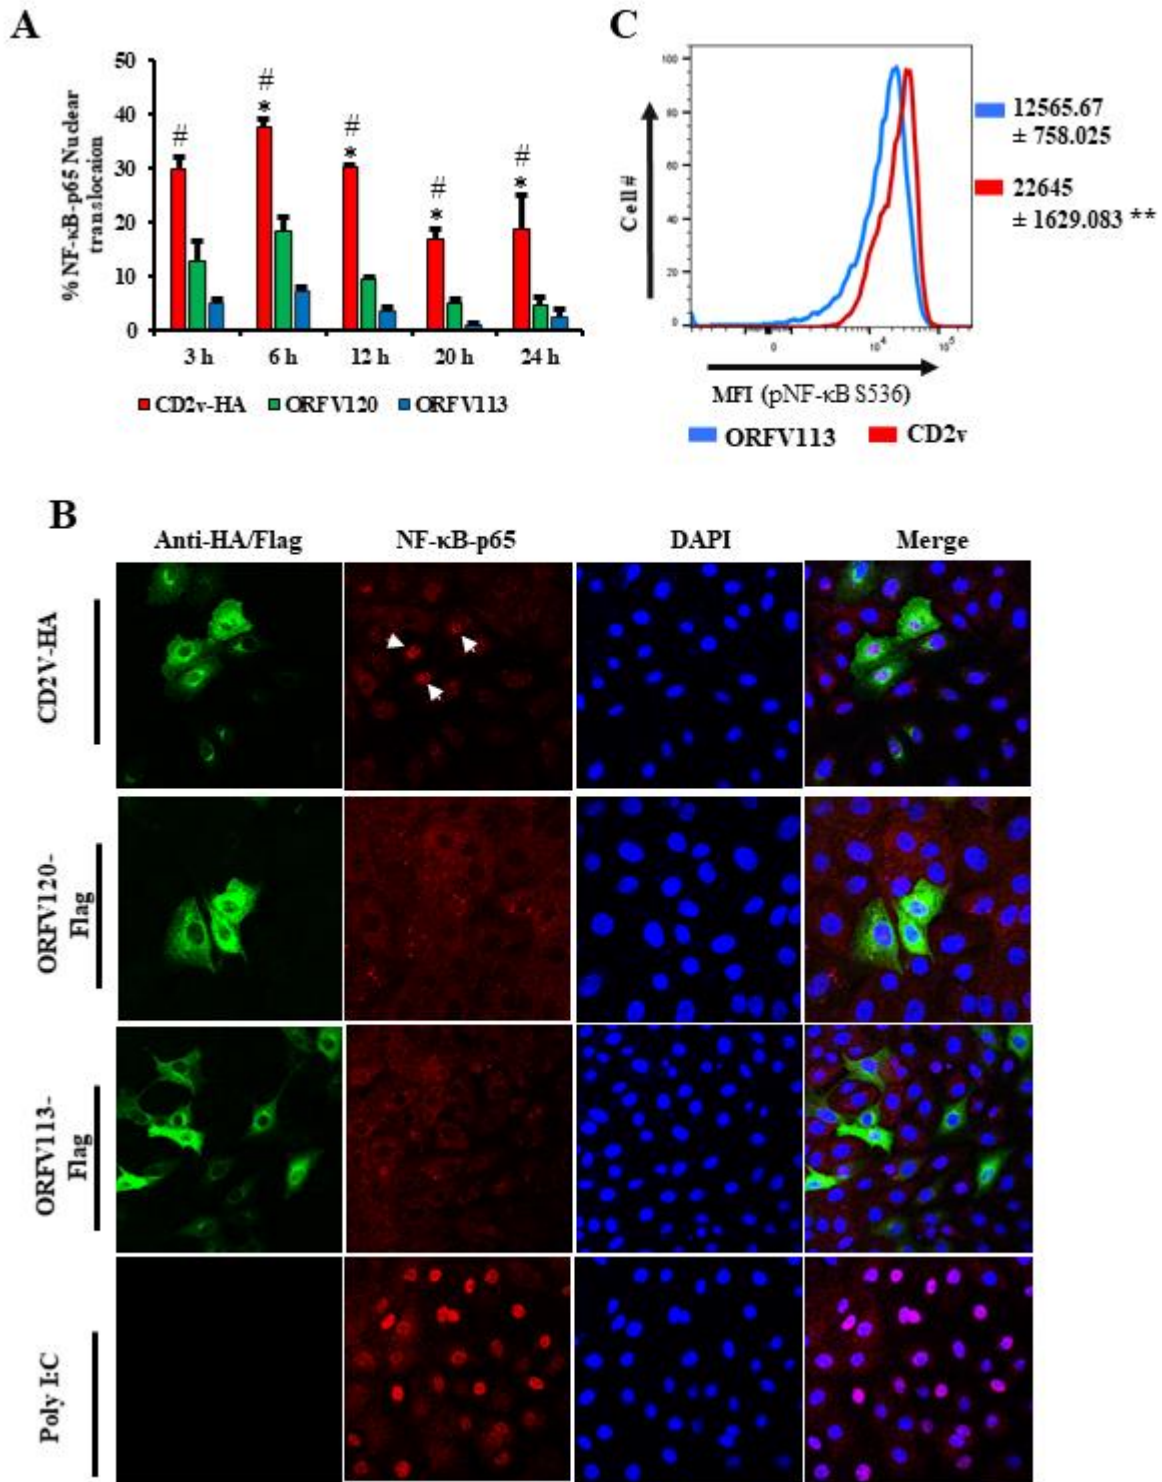

848  
849  
850  
851  
852

853 **FIG 5. Induction of NF- $\kappa$ B-p65 nuclear translocation in CD2v-expressing cells.** PK15 cells  
854 were transfected with pCD2v-HA, pORFV120-Flag or pORFV113-Flag, processed for  
855 immunofluorescence using primary antibodies against HA or Flag and NF- $\kappa$ B-p65, and  
856 secondary antibodies Alexa fluor 488 to detect CD2v, ORFV120 or ORFV113 and Alexa fluor  
857 594 to detect NF- $\kappa$ B-p65, and counterstained with DAPI. Cells were counted from 15 random  
858 fields/slide (approximately 100 cells/slide) and results, shown as percentage of cells with nuclear  
859 NF- $\kappa$ B-p65, are mean values from three independent experiments. (A) Percentage of NF- $\kappa$ B-p65  
860 nuclear translocation following the different treatments. *P*-values relative to ORFV120 and  
861 ORFV113 were 0.056 and 0.009 (3 h); 0.01 and 0.0006 (6 h); 0.019 and 0.02 (12 h); 0.005 and  
862 0.004 (20 h); and 0.016 and 0.009 (24 h), respectively. \* and # denote statistical significance  
863 compared to ORFV120 and ORFV113, respectively. (B) Confocal microscopy images showing  
864 NF- $\kappa$ B-p65 nuclear translocation at 3 h post transfection (pt; arrows). Green, CD2v or ORFV120  
865 or ORFV113; Red, NF- $\kappa$ B-p65; Blue, DAPI. (C) Mean fluorescence intensity (MFI) of  
866 phosphorylated NF- $\kappa$ B (S536) fluorescence measured by flow cytometry in CD2v and ORFV113  
867 expressing cells at 3 h pt. Results representative of three independent experiments. *P*-value  
868 relative to ORFV113 is 0.0082.  
869

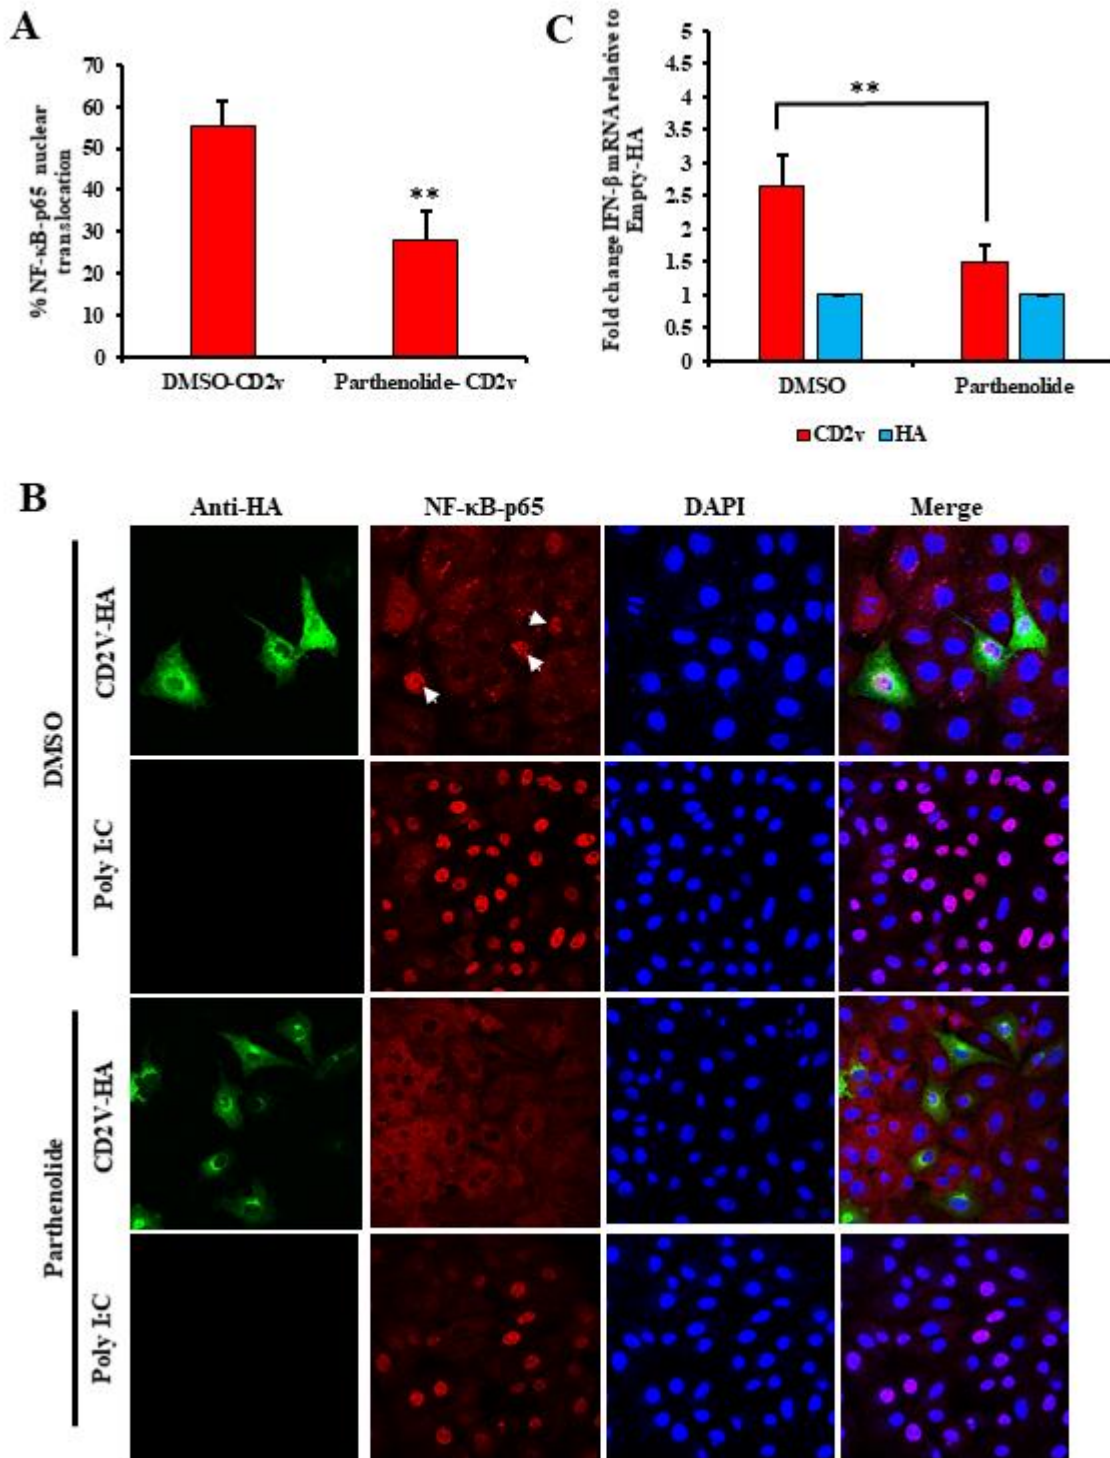

870  
871  
872  
873  
874

875 **FIG 6. CD2v expression induces IFN- $\beta$  transcription in NF- $\kappa$ B dependent manner in PK15**  
876 **cells.** PK15 cells pretreated with the NF- $\kappa$ B inhibitor parthenolide (1  $\mu$ M) or DMSO (vehicle  
877 control) for one hour, were transfected with pCD2v-HA, fixed at 3 h post transfection and  
878 processed for immunofluorescence with antibodies against HA and NF- $\kappa$ B-p65. Cells were  
879 counted from 15 random fields/slide (approximately 100 cells/slide) (A) Percentage of CD2v-  
880 expressing cells with nuclear NF- $\kappa$ B-p65. Results are expressed as mean values from three  
881 independent experiments ( $P = 0.001$ ). (B) Representative confocal images of cells treated as  
882 above. Green, CD2v; Red, NF- $\kappa$ B-p65; Blue, DAPI. Arrows indicate nuclear NF- $\kappa$ B-p65. (C)  
883 PK15 cells treated with parthenolide (1  $\mu$ M) or DMSO for one hour, were transfected with  
884 pCD2v-HA in presence or absence of parthenolide. Total RNA was extracted at 6 h pt, cDNA  
885 prepared and IFN-  $\beta$  transcription assessed by RT-PCR. Fold changes relative to Empty-HA and  
886 data are means from four independent experiments ( $P = 0.008$ ). (\*,  $P < 0.05$ ; \*\*,  $P < 0.01$ ).  
887

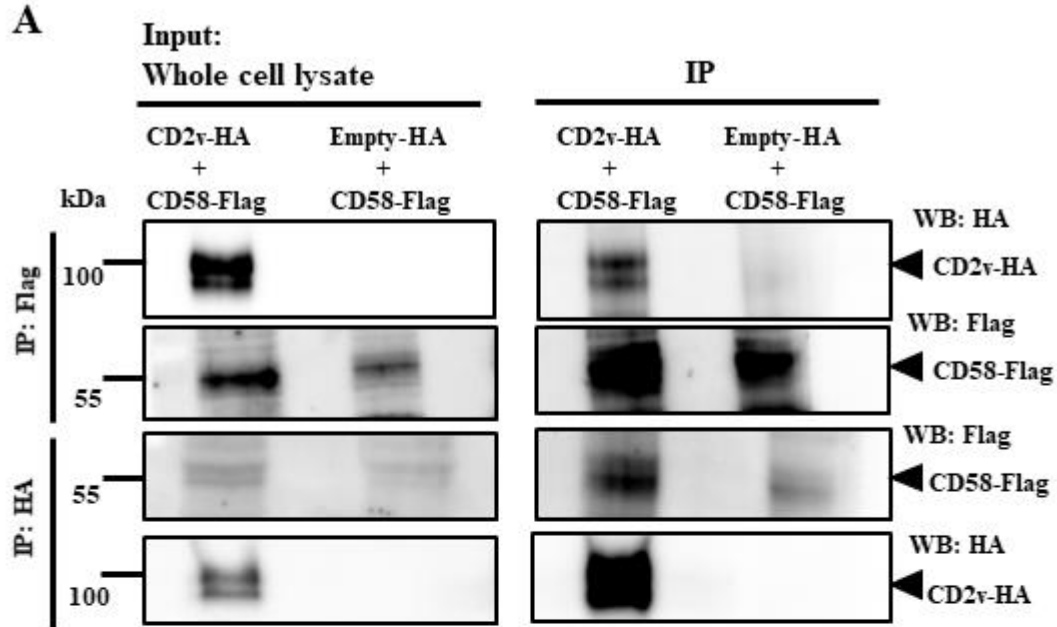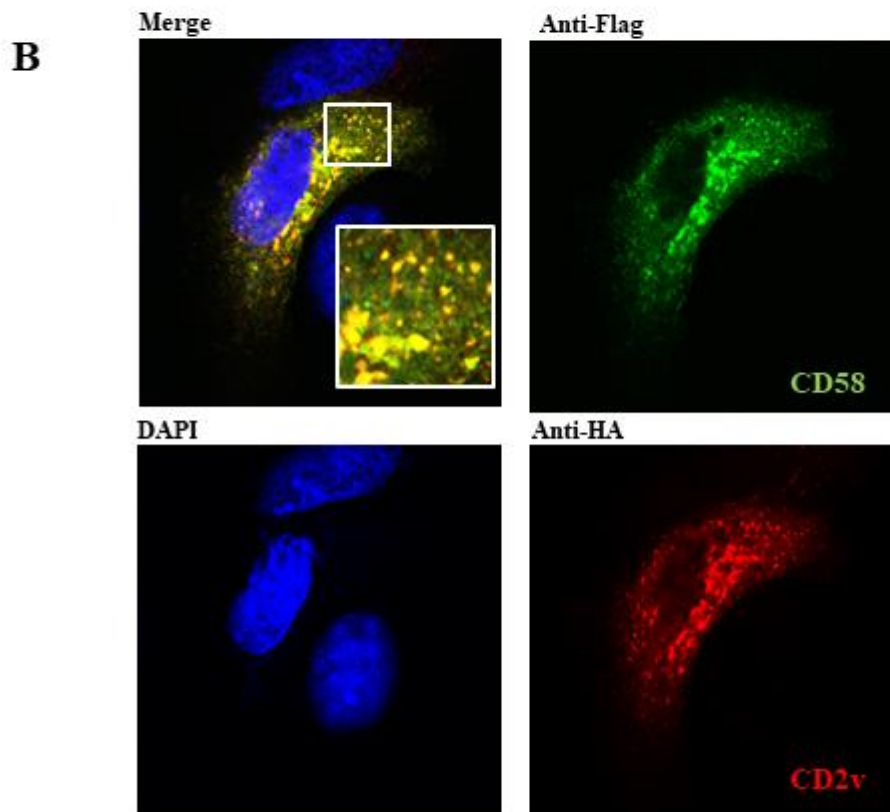

888  
889  
890  
891  
892

893 **FIG 7. Interaction between CD2v and porcine CD58.** (A) For co-immunoprecipitation  
894 experiments, PK15 cells were co-transfected with plasmids pCD58-Flag and pCD2v-HA, or  
895 pCD58-Flag and pEmpty-HA (control) and harvested at 8 h post transfection (pt). Whole cell  
896 lysates (left) and extracts immunoprecipitated with anti-Flag antibodies (IP, two top panels) or  
897 anti-HA (IP, two bottom panels) were examined by Western blotting with antibodies directed  
898 against proteins indicated on the right. Results are representative of three independent  
899 experiments. (B) For co-localization studies, PK15 cells were co-transfected with pCD58-Flag  
900 and pCD2v-HA, fixed at 24 h pt, incubated with mouse anti-Flag and rabbit anti-HA primary  
901 antibodies, washed, and incubated with secondary antibodies (Alexa-fluor 488-labeled anti-  
902 mouse and Alexa-fluor 594-labeled anti-rabbit). Cells were counterstained with DAPI, and  
903 examined with the confocal microscope. Results are representative of three independent  
904 experiments. Insets show magnified areas of the field.  
905

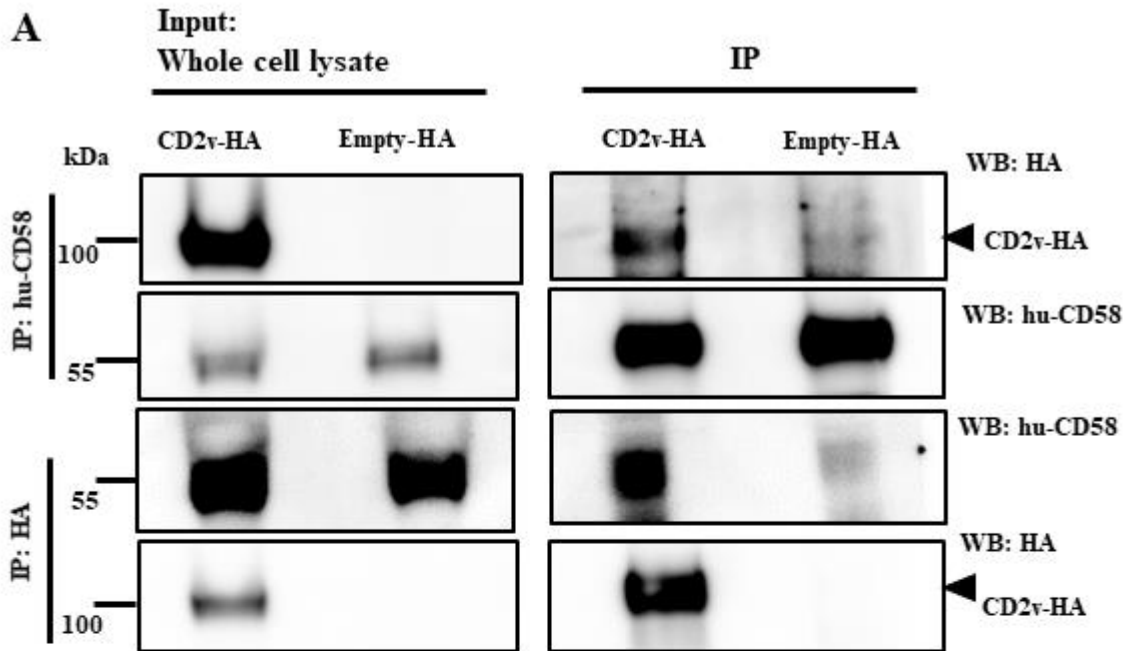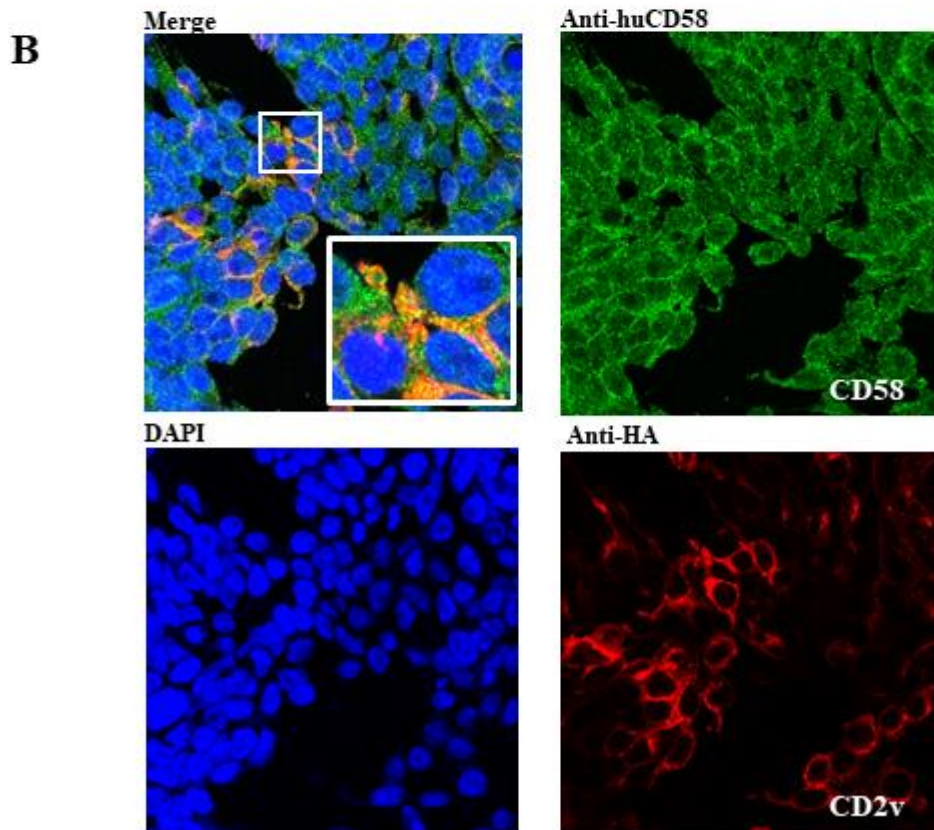

906  
907  
908  
909  
910



911 **FIG 8. Interaction between CD2v and human CD58.** (A) For co-immunoprecipitation, 293T  
912 cells were transfected with pCD2v-HA or pEmpty-HA (control) and harvested at 8 h pt. Whole  
913 cell lysates (left) and extracts immunoprecipitated with mouse anti-huCD58 antibodies (IP, two  
914 top panels) or anti-HA (IP, two bottom panels) were examined by Western blotting with  
915 antibodies directed against proteins indicated on the right. Results are representative of three  
916 independent experiments. (B) For co-localization, 293T cells were transfected with pCD2v-HA,  
917 fixed at 24 h pt, incubated with mouse anti-huCD58 and rabbit anti-HA primary antibodies,  
918 washed, and incubated with Alexa-fluor 488-labeled anti-mouse and Alexa-fluor 594-labeled  
919 anti-rabbit secondary antibodies. Cells were counter stained with DAPI, and examined with the  
920 confocal microscope. Results are representative of three independent experiments. Insets show  
921 magnified areas of the field.  
922

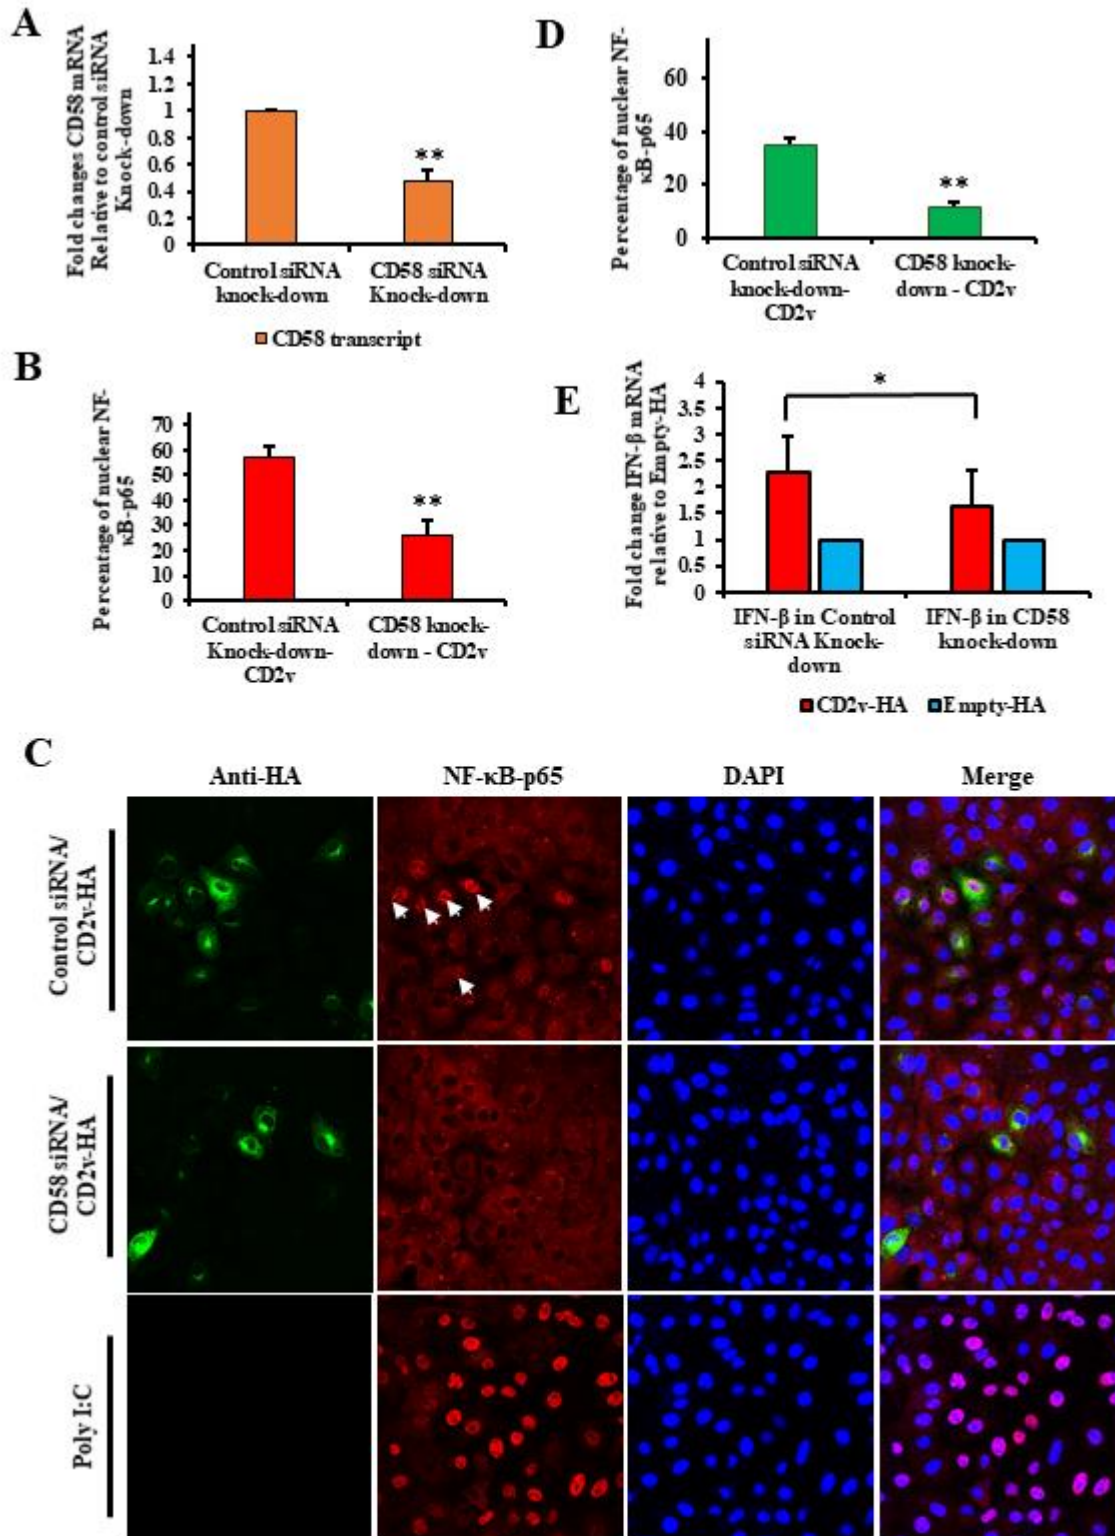

923  
924  
925  
926  
927

928 **FIG 9. CD2v-CD58 interaction affects CD2v-mediated NF- $\kappa$ B-p65 nuclear translocation**  
929 **and IFN- $\beta$  induction.** (A) siRNA knock down of CD58. PK15 cells were transfected with CD58  
930 siRNA or siRNA universal negative control, total RNA was extracted at 24 h pt, cDNA prepared  
931 and CD58 transcription assessed by RT-PCR. Results are mean of five independent experiments  
932 ( $P = 0.0002$ ). (B) NF- $\kappa$ B-p65 nuclear translocation. PK15 cells were sequentially transfected  
933 with CD58 siRNA or siRNA universal negative control and pCD2v-HA or pEmpty-HA, fixed at  
934 3 h pt, and processed for detection of NF- $\kappa$ B-p65 by immunofluorescence. Cells were counted  
935 from 15 random fields/slide (approximately 100 cells/slide) and results are shown as percentage  
936 of CD2v-expressing cells with nuclear NF- $\kappa$ B-p65. Results are mean of three independent  
937 experiments ( $P = 0.0035$ ). (C) Percentage of CD2v-expressing cells with strong nuclear NF- $\kappa$ B-  
938 p65 translocation ( $P = 0.0015$ ). (D) Representative images of NF- $\kappa$ B-p65 nuclear translocation  
939 under conditions outlined in A. Green, CD2v; Red, NF- $\kappa$ B-p65; Blue, DAPI. Arrows indicate  
940 nuclear NF- $\kappa$ B-p65. (E) IFN- $\beta$  induction. PK15 cells were sequentially transfected with CD58  
941 siRNA or siRNA universal negative control, and pCD2v-HA or pEmpty-HA. Total RNA was  
942 extracted at 6 h pt, cDNA prepared and transcription of IFN- $\beta$  assessed by RT-PCR. Fold  
943 changes are relative to Empty-HA and data are mean mRNA levels from eight independent  
944 experiments ( $P = 0.025$ ). (\*,  $P < 0.05$  and \*\*,  $P < 0.01$ ).

945

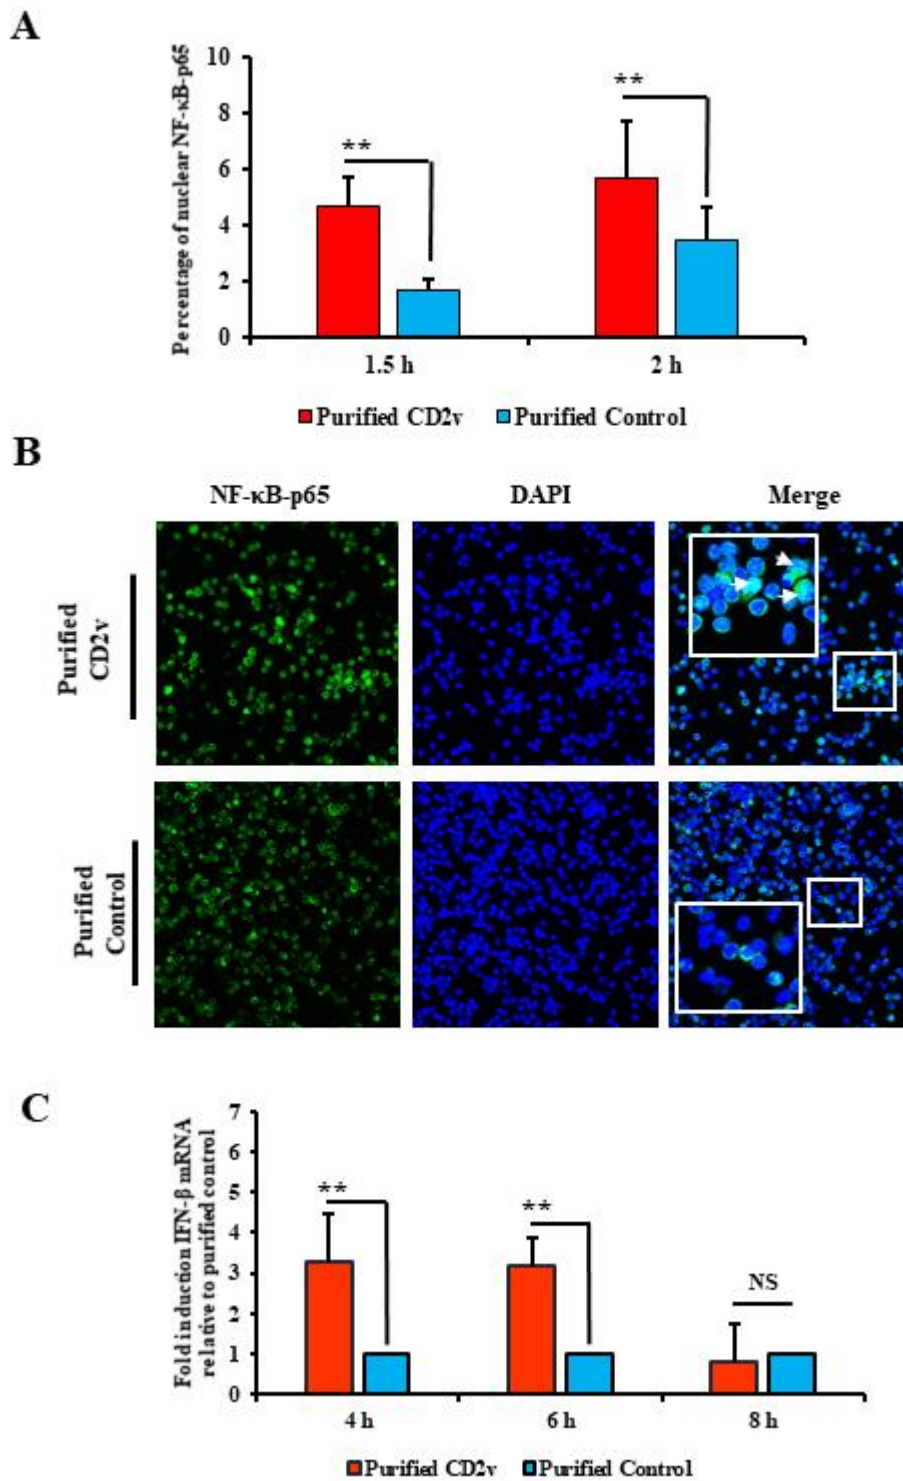

946  
947  
948  
949  
950

951 **FIG 10. Purified CD2v induces NF- $\kappa$ B-p65 nuclear translocation and IFN- $\beta$  transcription**  
952 **in swine PBMCs.** Purified CD2v, purified control, and swine PBMCs were obtained as indicated  
953 in materials and methods. (A) Swine PBMCs were treated with purified CD2v or purified  
954 control, fixed at 1.5 h and 2 h post treatment, sequentially incubated with anti-NF- $\kappa$ B-p65  
955 primary antibody and Alexa fluor 488-labeled secondary antibody, stained with DAPI,  
956 cytopspined, and examined by confocal microscopy. Cells were counted from 15 random  
957 fields/slide (approximately 2000 cells/slide) and results are shown as percentage of cells with  
958 nuclear NF- $\kappa$ B-p65. Results are mean of four independent experiments (1.5 h,  $P = 0.01$ ; 2 h,  $P =$   
959  $0.012$ ). (B) Representative confocal images of NF- $\kappa$ B-p65 nuclear translocation under conditions  
960 outlined in A. Green, NF- $\kappa$ B-p65; Blue, DAPI. Insets show magnified areas of the field. Arrows  
961 indicate nuclear NF- $\kappa$ B-p65. (C) IFN- $\beta$  induction. Total RNA was harvested at 4 h, 6 h and 8 h  
962 post treatment and IFN- $\beta$  transcription was assessed by RT-PCR. Fold changes are relative to  
963 purified control and data are mean mRNA levels of seven independent experiments (4 h,  $P =$   
964  $0.016$ ; 6 h,  $P = 0.002$ ). (\*,  $P < 0.05$  and \*\*,  $P < 0.01$ ).

965

**A**

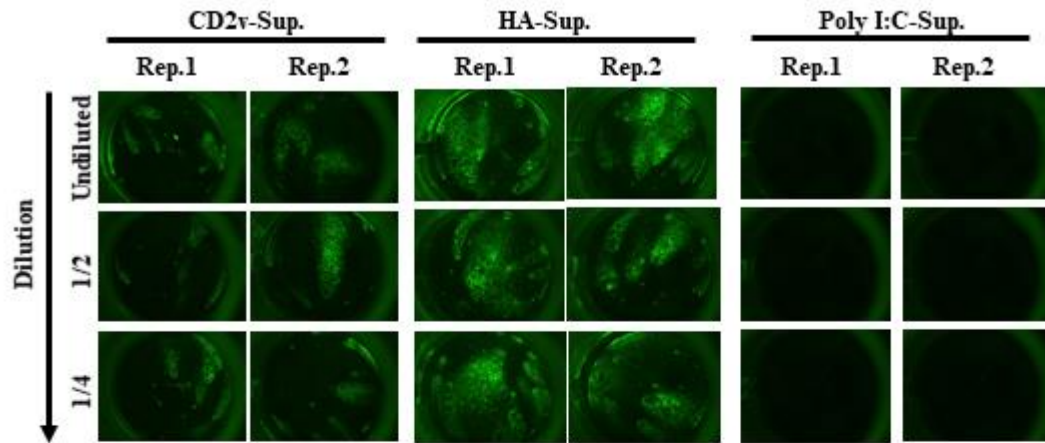

**B**

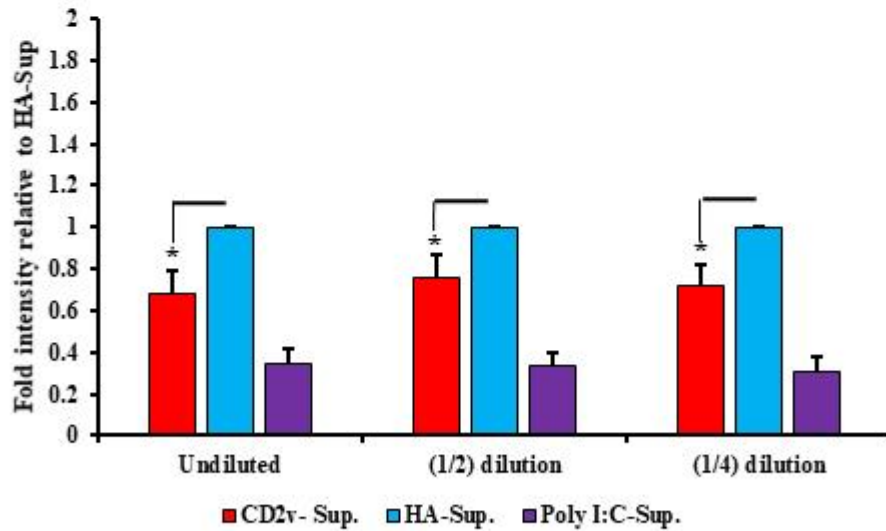

966  
967  
968  
969  
970

971 **FIG 11. Antiviral activity of supernatants from CD2v -treated swine PBMCs.** Swine PBMCs  
972 were treated with purified CD2v protein or purified control, and supernatants collected 24 h post  
973 treatment. Supernatant collected from PK15 transfected with Poly I:C (positive control). PK15  
974 grown in 96 well plates were treated with different dilutions of PBMC supernatants for 24 h and  
975 subsequently infected with VSV<sup>GFP</sup> (50 PFU/well) for 16 h. (A) Representative fluorescence  
976 images of PK15 fixed at 16 h post VSV<sup>GFP</sup> infection. Green, VSV<sup>GFP</sup>. Rep., denotes technical  
977 replicates. (B) Intensity (mean gray value) measured by ImageJ. Fold changes are relative to  
978 purified control and data are mean of four independent experiments. *P*-values relative to purified  
979 control for undiluted, 1:2 diluted and 1:4 diluted supernatants were 0.014, 0.033 and 0.017,  
980 respectively (\*, *P*<0.05).  
981

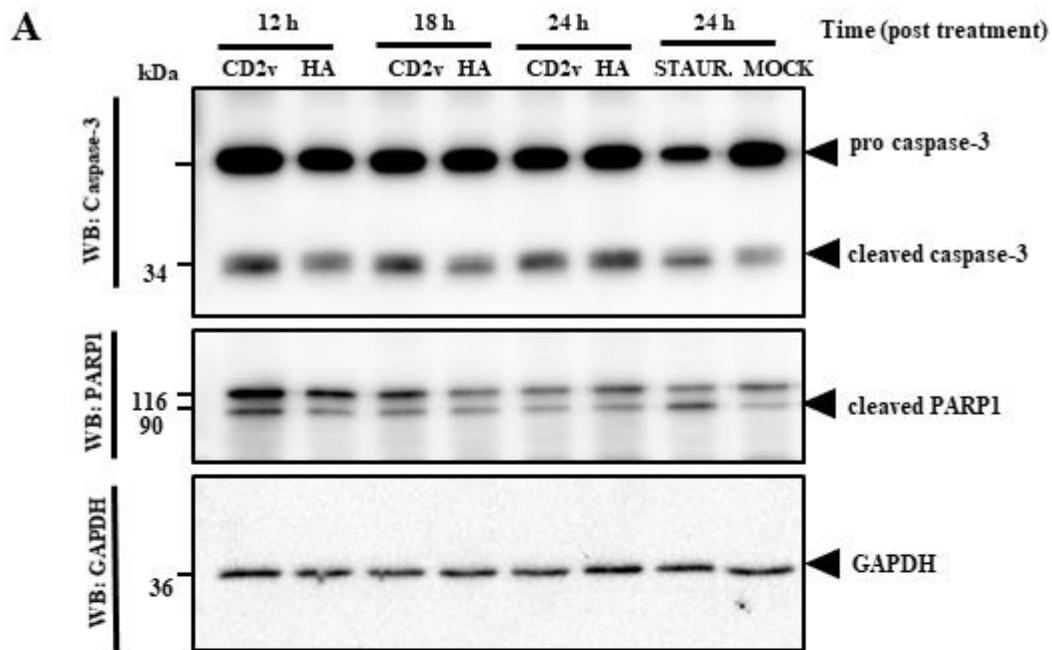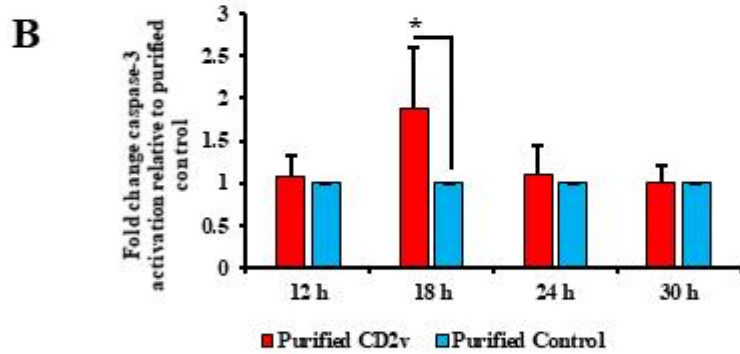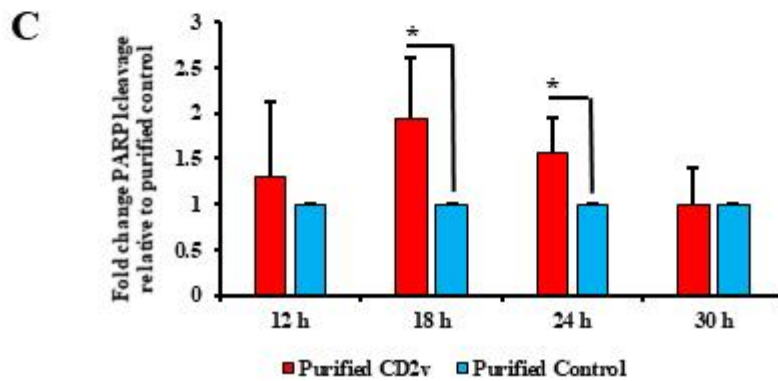

982  
983  
984  
985  
986



987 **FIG 12. Purified CD2v induces apoptosis in swine PBMC** (A) Swine PBMC were treated with  
988 purified CD2v, purified control, or staurosporine (positive control) and whole cell lysates were  
989 obtained at 12 h, 18 h, 24 h and 30 h post treatment, resolved by SDS-PAGE, blotted, and probed  
990 with antibodies against Caspase-3, PARP1 and GAPDH. (B) Densitometric analysis showing the  
991 fold change in caspase-3 activation relative to purified control treatment, the caspase-3 results  
992 are mean values of six independent experiments (18 h,  $P = 0.042$ ). (C) Densitometric analysis  
993 showing fold changes in PARP1 cleavage relative to purified control treatment. Results are mean  
994 values of six independent experiments (18 h,  $P = 0.026$ ; 24 h,  $P = 0.018$ ). (\*,  $P < 0.05$ ).

995

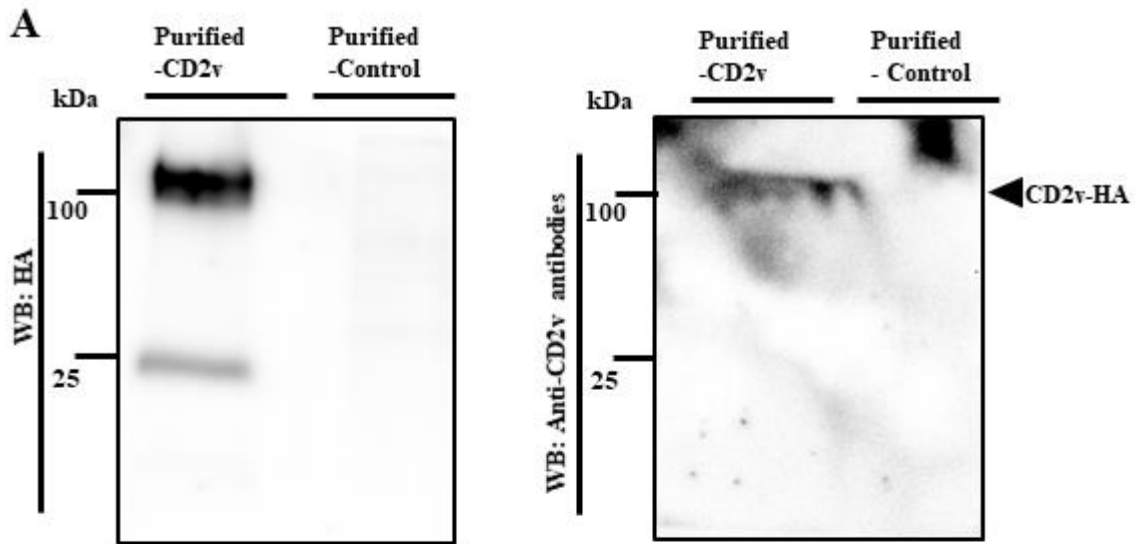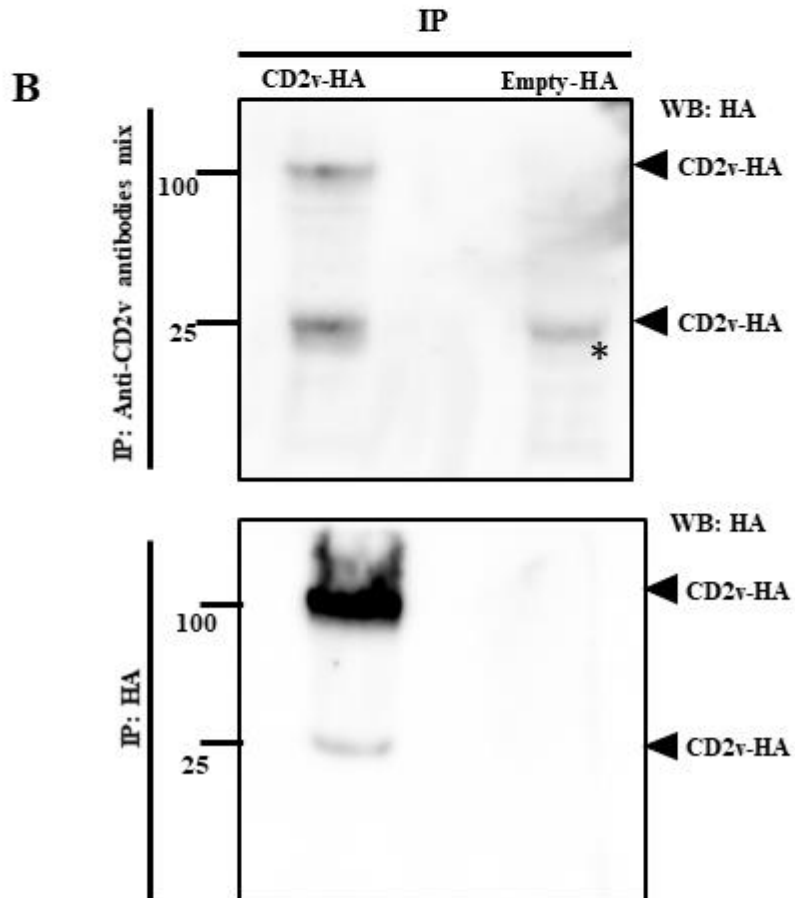

996  
997  
998  
999  
1000

1001 **FIG 13. Monoclonal antibodies generated against ASFV CD2v identifies CD2v in Western**  
1002 **blots.** (A) Purified CD2v or purified control, were resolved by SDS-PAGE, blotted, and probed  
1003 with anti-CD2v monoclonal antibodies (A4, C4, C3 and F2; top right) or probed with anti-HA  
1004 antibody (control; top left). Results are representative of three independent experiments. (B)  
1005 Whole cell extracts were immunoprecipitated with anti-CD2v monoclonal antibodies (upper  
1006 blot) or anti-HA antibody (control; lower blot), resolved with SDS-PAGE, and probed with anti-  
1007 HA antibody. Results are representative of three independent experiments. \* denotes light chain  
1008 band.  
1009

**A**

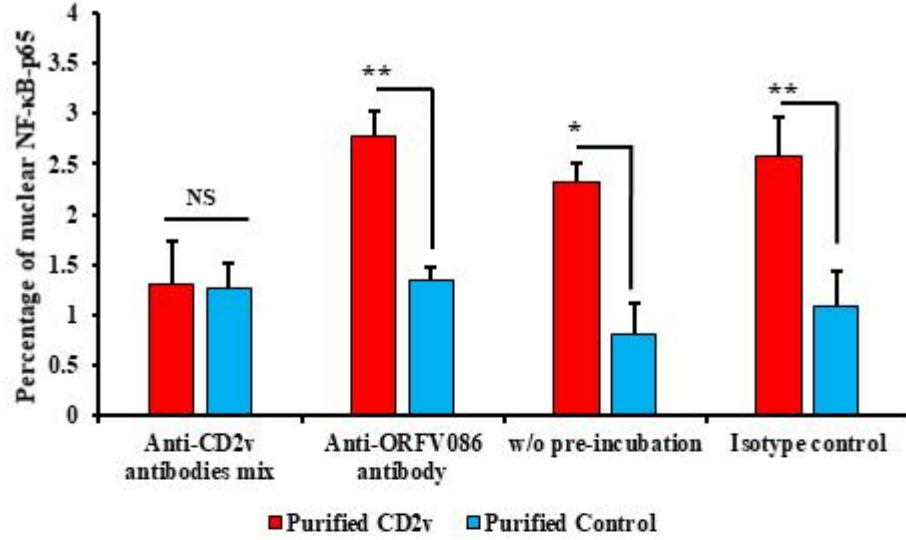

**B**

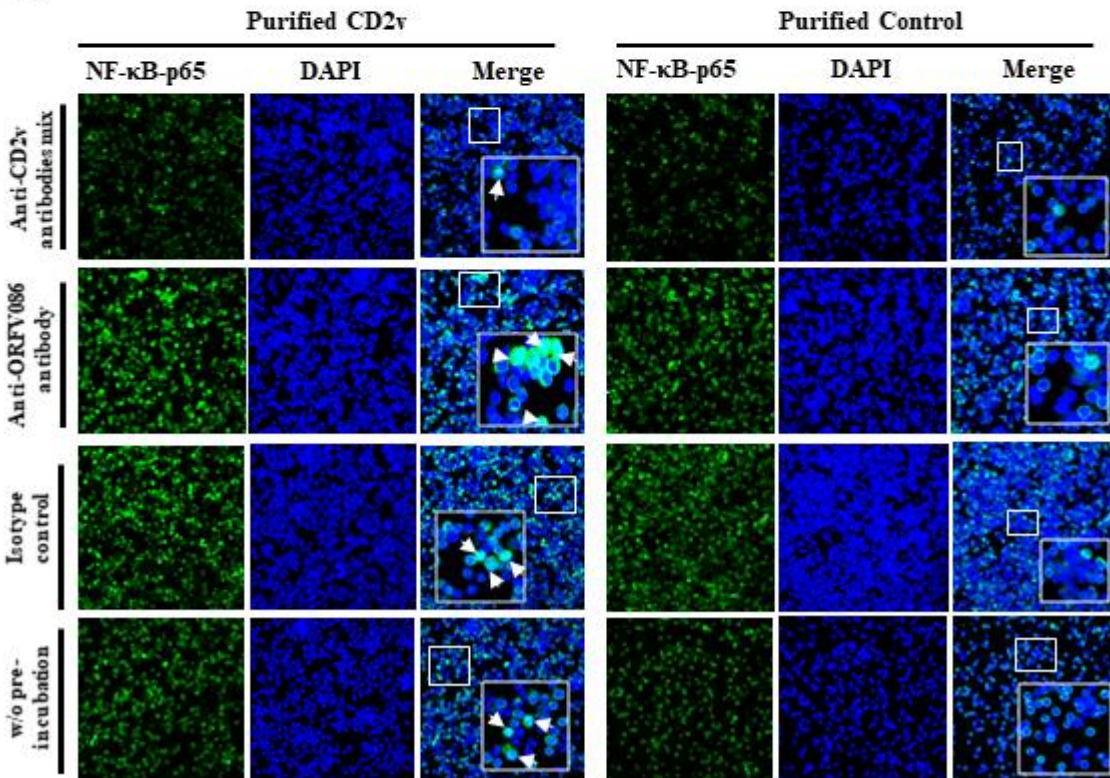

1010  
1011  
1012  
1013  
1014

1015 **FIG 14. Monoclonal antibodies against ASFV CD2v inhibit CD2v-induced NF- $\kappa$ B**  
1016 **activation in swine PBMCs.** (A) Purified CD2v or purified control pre-incubated with anti-  
1017 CD2v monoclonal antibody mix, anti-ORFV086 antibody or isotype control antibody were used  
1018 to treat swine PBMCs for 1.5 h, and cells were processed for NF- $\kappa$ B-p65 staining by indirect  
1019 immunofluorescence as explained in materials and methods. Control cells were treated with  
1020 CD2v or purified control that have not been pre-incubated with antibodies. Cells were counted  
1021 from 15 random fields/slide (approximately 2500 cells/slide). Results, shown as percentage of  
1022 cells with nuclear NF- $\kappa$ B-p65, are mean values from three independent experiments (for %  
1023 nuclear NF- $\kappa$ B-p65 for anti-CD2v antibody mix relative to anti-ORFV086,  $P = 0.012$ ; without  
1024 pre-incubation,  $P = 0.031$  and for isotype control,  $P = 0.03$ . (\*,  $P < 0.05$ ; \*\*,  $P < 0.01$ ) (B)  
1025 Representative confocal images of NF- $\kappa$ B-p65 nuclear translocation. Green, NF- $\kappa$ B-p65; Blue,  
1026 DAPI. Arrows indicate nuclear NF- $\kappa$ B-p65. Insets show magnified areas of the field.

1027

1028

1029

1030

1031

1032

1033

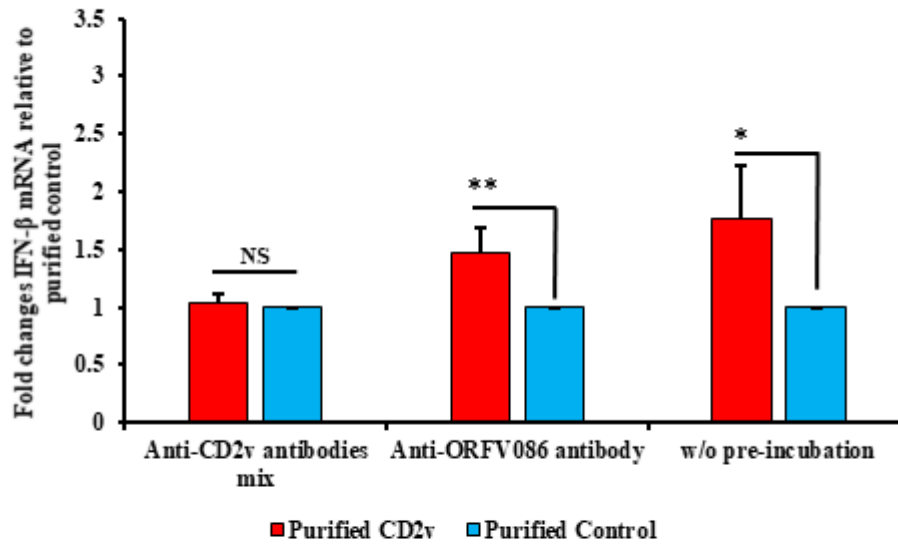

1034  
1035 **Fig 15. Monoclonal antibodies against ASFV CD2v inhibits CD2v-induced IFN-β**  
1036 **transcription in swine PBMC cultures.** Swine PBMCs were treated with purified CD2v or  
1037 purified control pre-incubated with anti-CD2v monoclonal antibody mix or anti-ORFV086  
1038 antibody, or with the proteins without previous incubation with antibodies. Total RNA was  
1039 harvested at 6 h post-treatment, and IFN-β transcription was assessed by RT-PCR. Fold changes  
1040 are relative to purified control and data are mean mRNA levels from five independent  
1041 experiments. *P*-value for IFN-β fold induction for anti-CD2v antibody mix compared to anti-  
1042 ORFV086 is 0.014 and without pre-incubation is 0.028 (\*, *P*<0.05 and \*\*, *P*<0.01).

1043  
1044  
1045  
1046  
1047  
1048  
1049  
1050  
1051  
1052  
1053  
1054  
1055  
1056  
1057

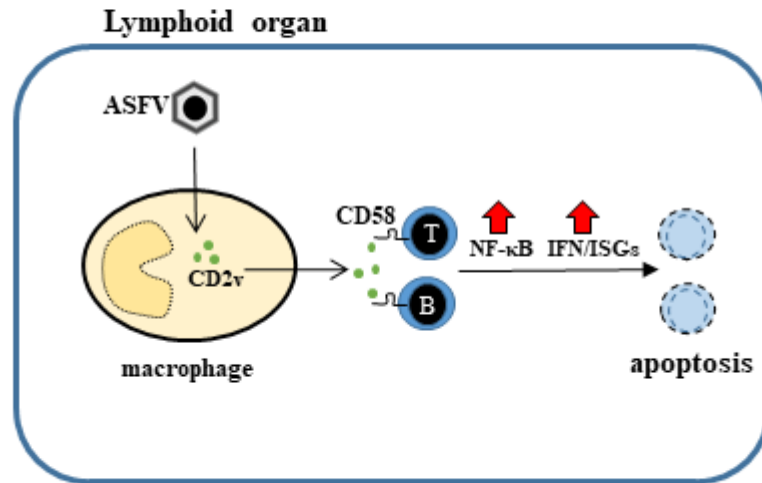

1058  
1059  
1060  
1061  
1062

**FIG 16. Proposed mechanism of action of ASFV CD2v.** CD2v secreted from ASFV-infected macrophages interacts with by-stander lymphocytes via CD58. This interaction promotes NF-κB activation and induction of IFN-β and ISGs, which lead to lymphocyte apoptosis.

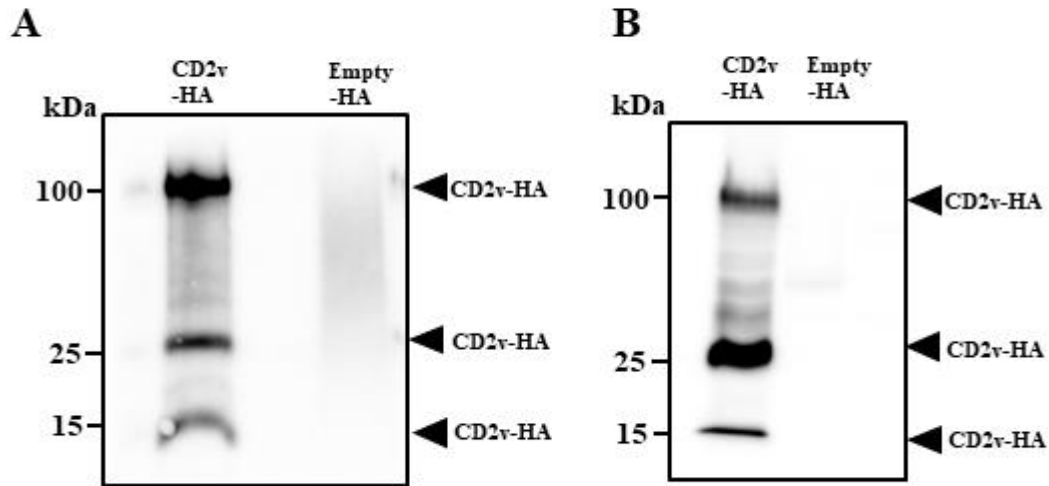

1063  
1064 **FIG S1. Expression of CD2v in 293T and Vero cells.** 293T (A) and Vero cells (B) mock  
1065 transfected or transfected with plasmid pCD2v-HA were harvested at 24 h post transfection.  
1066 Total cell protein extracts were resolved by SDS-PAGE, blotted and incubated with antibodies  
1067 against HA. Results are representative of two independent experiments.  
1068



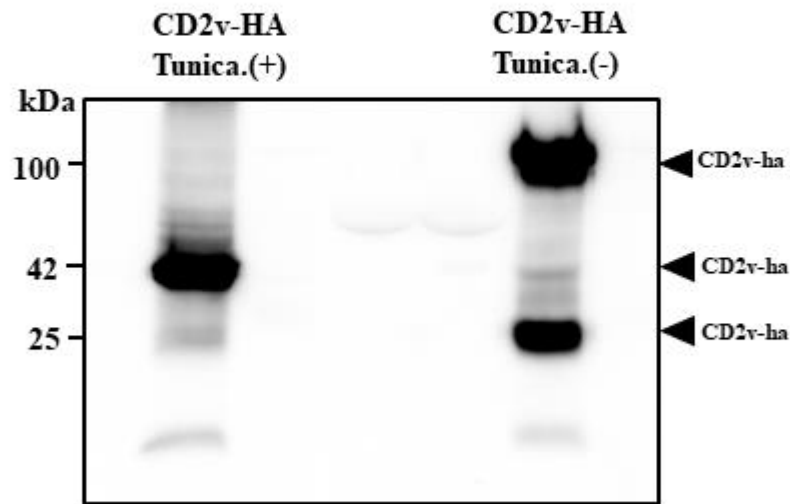

1069

1070 **FIG S2. CD2v expression in presence of tunicamycin.** Pk15 cells transfected with pCD2v-HA.  
1071 Five hours post-transfection, media was replaced with complete growth media containing 1 µg/ml  
1072 tunicamycin and incubated for 24 hr. Total cell extracts were resolved by SDS-PAGE, blotted  
1073 and incubated with antibodies against HA. Results are representative of two independent  
1074 experiments.

1075
